# Supplementary material for: A cattle graph genome incorporating global breed diversity
Source: PubMed Central journal article supplement (PMC8854726; doi:10.1038/s41467-022-28605-0), 2022-02-17
Supplement: 41467_2022_28605_MOESM1_ESM.pdf [file 41467_2022_28605_MOESM1_ESM.pdf]

# **A cattle graph genome incorporating global breed diversity**

Talenti et al.

This PDF file includes:

- 1) Supplementary Figure 1-4
- 2) Supplementary Methods 1
- 3) Supplementary Notes 1-3
- 4) Supplementary Tables 1-7

# Supplementary figures

Supplementary figure 1: **Repeat content of the genomes.** Repetitive elements composition in the five assemblies calculated using RepeatMasker, showing the similar compositions of the five genomes.

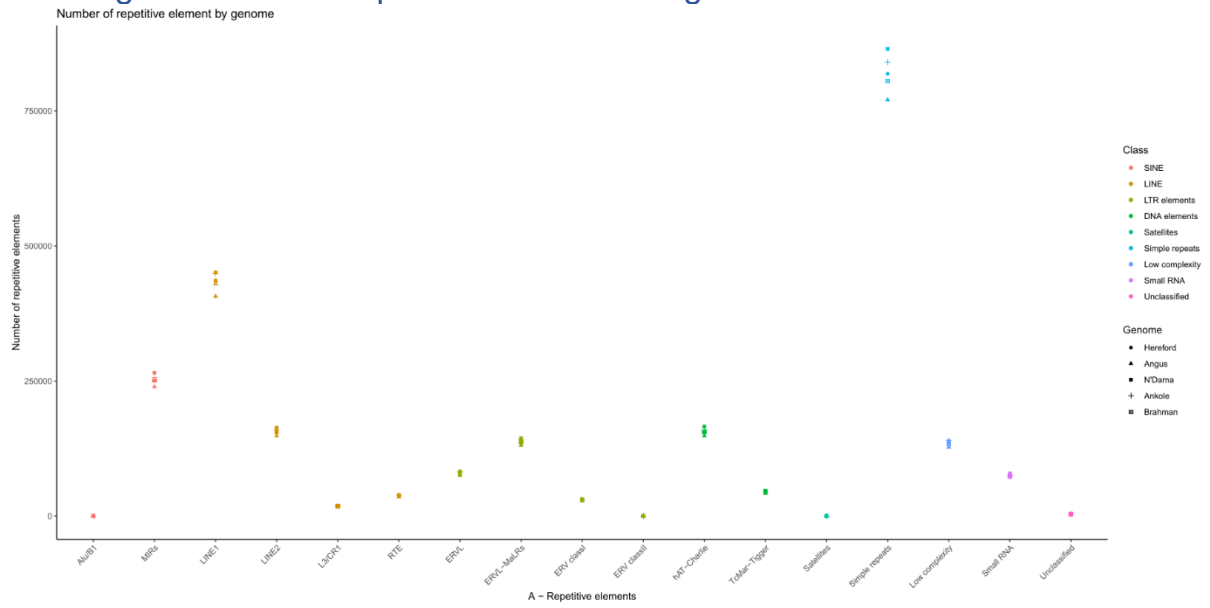

Supplementary figure 2: **MHC diversity**. Alignments generated by minimap2 over the whole chromosome 23, showing the MHC region as a drop in alignment identity in all the assemblies.

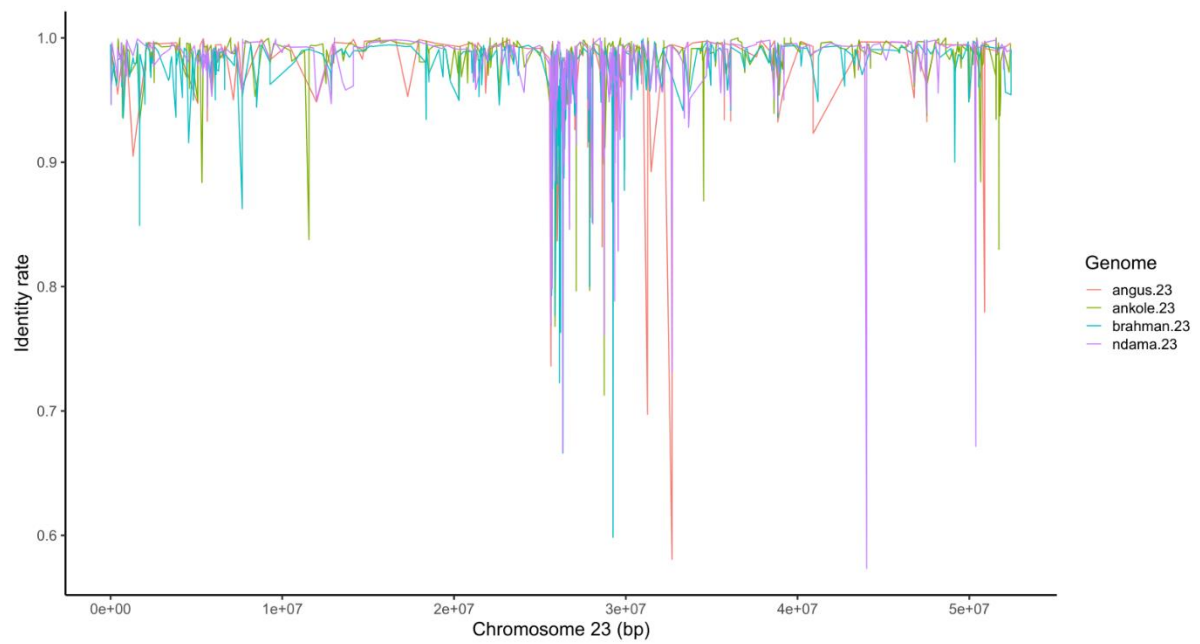

Supplementary figure 3: **Selection on indels in coding regions.** Allele size distribution in intergenic and intragenic portions of the genome, showing how in-frame indels from the graph were more common than other coding indels, consistent with selection disproportionately removing frameshift changes.

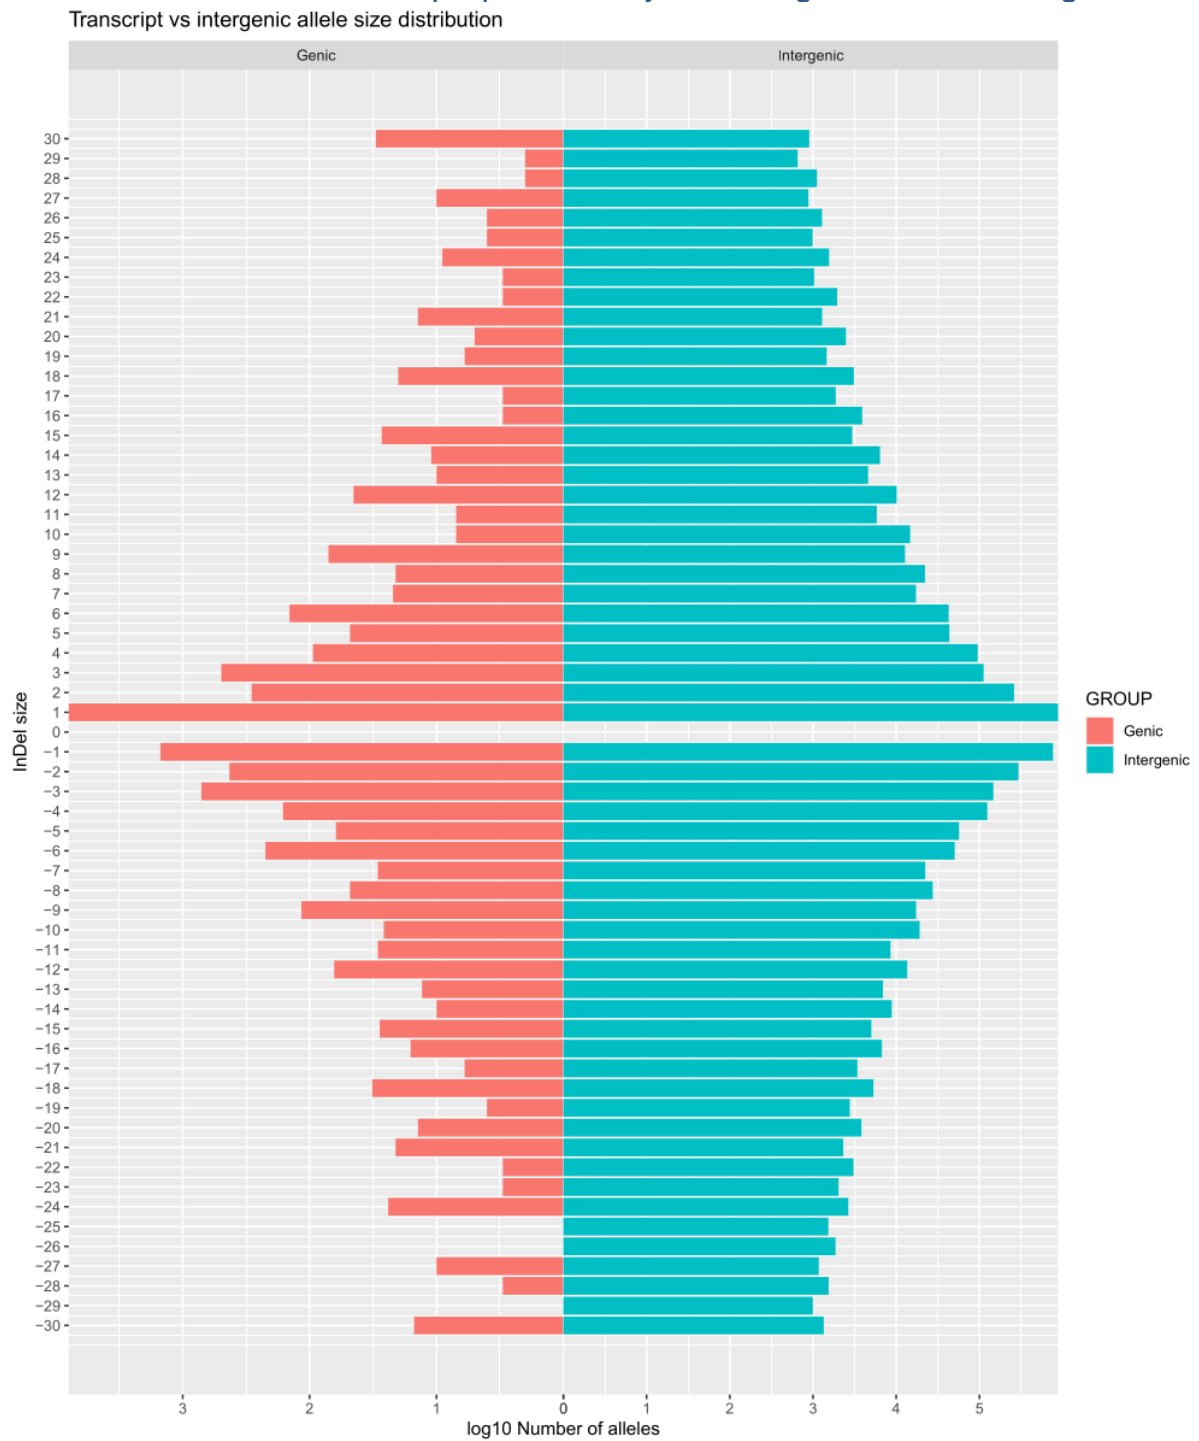

Supplementary figure 4: **Divergence across assemblies on chromosome 12.** Alignment of chromosome 12 of the five assemblies, showing the gap in the N'Dama genome is a high-complexity region across the assemblies.

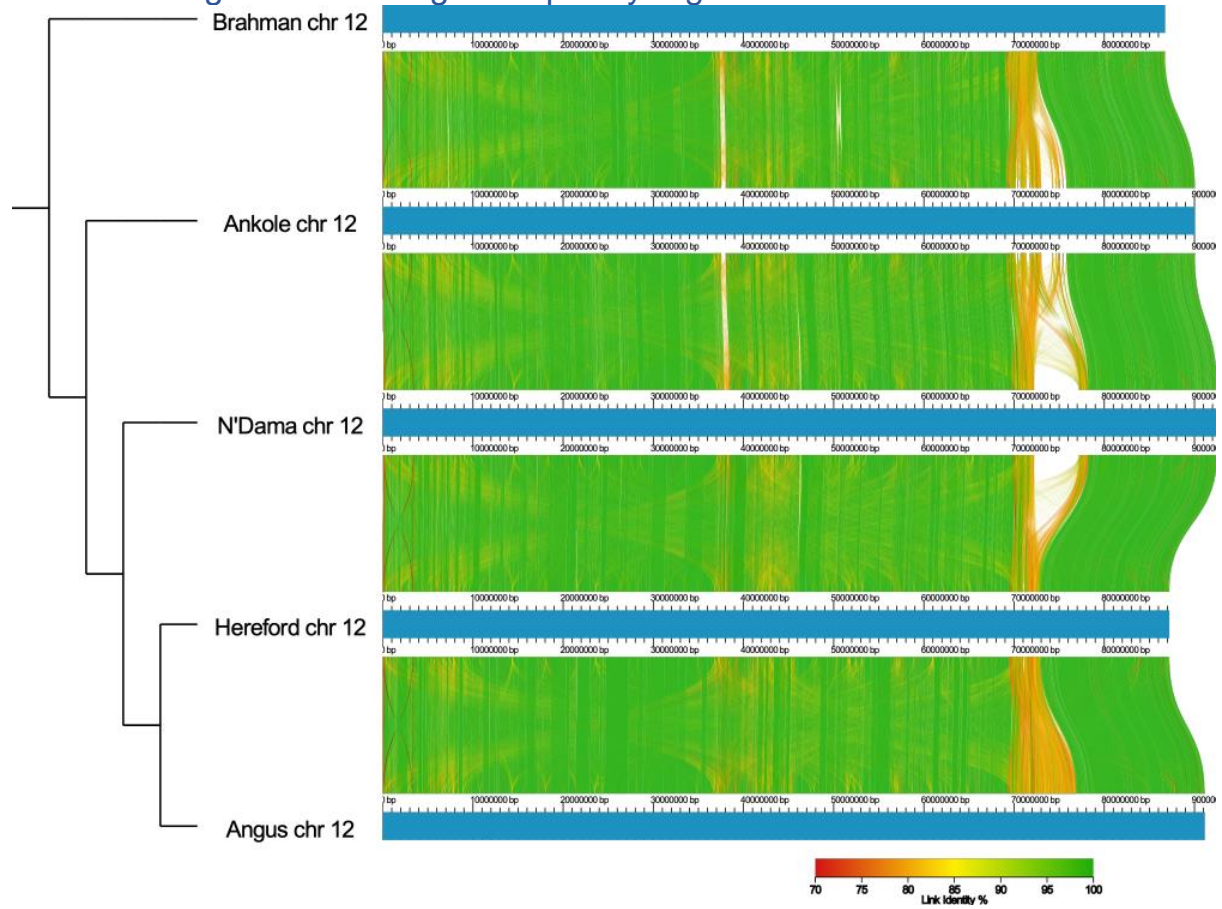

## Supplementary methods

Supplementary methods 1 - Detailed description of the preparation of the ATAC-seq samples.

### *Extraction of PBMC DNA and isolation of B cells*

Peripheral blood mononuclear cells (PBMCs) were isolated from Holstein Friesian, N'Dama and Nelore peripheral blood by density gradient centrifugation using Ficoll Plaque Plus (GE Healthcare). DNA was extracted from PBMC using a QIAGEN DNeasy blood and tissue kit with proteinase K and RNase treatment. For isolation of B cells, PBMCs were resuspended at  $3 \times 10^7$  cells/ml in PBS/2 mM EDTA/0.5% BSA and incubated with 0.066  $\mu\text{g/ml}$  ILA58 monoclonal antibody, which binds the immunoglobulin light chain, for 20 min at 4°C. After two washes in PBS/2 mM EDTA/0.5% BSA, PBMCs were incubated in 2 ml of 2  $\mu\text{g/ml}$  PE-conjugated goat anti-mouse IgG2a (Molecular probes) for 20 min at 4°C. PBMCs were washed twice and were resuspended in PBS/2 mM EDTA/0.5% BSA with or without 1  $\mu\text{g/ml}$  DAPI (Invitrogen). B cells were sorted on a FACSAria II or III Cell Sorter (BD Biosciences) or BD Influx Cell Sorter (BD Biosciences) with 82 - 97 % purity validated by post-sort flow cytometric analysis of 1,000 events. All cells were stained and sorted within 9 hours of blood collection and kept on ice between processing steps.

### *ATAC-seq library preparation*

Cells of the mouse mastocytoma cell line P815 were spiked into the Holstein Friesian B cell sample at a 1:10 ratio. For the three breeds, 50,000 cells were transferred into a 96-well v-bottomed plate on ice. Cells were centrifuged at 500 xg, 4°C for 2 min and the supernatant was removed. Next, cells were resuspended in 100  $\mu\text{l}$  cold lysis buffer (10 mM Tris hydrochloride, pH 7.4, 10 mM sodium chloride, 3 mM magnesium chloride, 0.1% IGEPAL CA-630). Cells were centrifuged at 500 xg at 4°C for 10 min and the supernatant was discarded. Nuclei were resuspended in 50  $\mu\text{l}$  transposase mixture (25  $\mu\text{l}$  2x TD buffer, 2.5  $\mu\text{l}$  TDE1 Tagment DNA (Illumina) and 22.5  $\mu\text{l}$  nuclease-free water), transferred to 1.5 ml microcentrifuge tubes, and then were incubated for 30 min at 37°C in an Eppendorf Thermomixer with agitation at 300 rpm. Transposed DNA was purified using a QIAGEN MinElute Reaction Cleanup Kit with elution in 14  $\mu\text{l}$  water. To generate presumably nucleosome-free ATAC-seq libraries, these steps were repeated using 1500 - 2000 ng Holstein Friesian PBMC DNA treated with protease K in replacement of the 50,000 cells. Transposed DNA was then amplified using Nextera primers listed in Buenroostro et al., 2015<sup>1</sup>.

Specifically, all samples were amplified using the index i5 primer v2\_Ad1.1\_TAGATCGC and one of the index i7 v2\_Ad2.1 - 2.12 primers. qPCR reactions were carried out in duplicate using 0.5  $\mu\text{l}$  transposed DNA, 5  $\mu\text{l}$  NEBNext High-Fidelity 2x PCR Master Mix (NEB), 1.25  $\mu\text{l}$  10  $\mu\text{M}$  dual-index PCR primers (Integrated DNA Technologies), 0.25  $\mu\text{l}$  20x SYBR Green I (Invitrogen), 0.15  $\mu\text{l}$  1 mM ROX reference dye (Agilent Technologies), and 1.6  $\mu\text{l}$  nuclease-free water (QIAGEN). The PCR conditions were as follows: 72°C for 5 min, then 98°C for 30 sec, followed by 21 thermocycles at 98°C for 10 sec, 63°C for 30 sec and 72°C for 1 min. To calculate the appropriate number of cycles for amplification of the remaining transposed DNA, linear Rn was plotted against cycle number to determine the cycle number corresponding to one-quarter of the maximum fluorescent intensity, with an average taken across duplicates. This number of cycles was used to amplify the remaining 12.5  $\mu\text{l}$  transposed DNA using 25  $\mu\text{l}$  NEBNext High-Fidelity 2x PCR Master Mix (NEB), 6.25  $\mu\text{l}$  10  $\mu\text{M}$  dual-index PCR primers, with the same cycling

conditions as described for qPCR. The DNA was purified using a Qiagen MinElute PCR Purification Kit (QIAGEN) with elution in 20 µl nuclease-free water (QIAGEN). To remove residual primers, the libraries were purified using 1.4X AMPure beads (Beckman Coulter). Then, two further AMPure steps were performed to remove large DNA fragments (>1000bp). The first used 0.5X AMPure beads with recovery of the supernatant, to which 1.3X AMPure beads were added to purify the final libraries. Library quality was assessed for the fragment length distribution on a 2200 TapeStation instrument (Agilent Technologies), using High Sensitivity D1000 ScreenTape and Reagents (Agilent Technologies). The library concentrations were measured on a Qubit 3.0 (Invitrogen) using a Qubit dsDNA High Sensitivity assay kit (Invitrogen). Resulting libraries were sequenced using 75 bp paired-end sequencing on a HiSeq 4000 sequencer (Illumina) or 50 bp paired-end sequencing on NovaSeq 6000 sequencer (Illumina) at the Edinburgh genomics facility.

## Supplementary Notes

Supplementary Note 1 – In-depth description of the N'Dama assembly process, with detailed metrics and processes

N'Dama long read sequencing

*Pre-Assembly statistics of sample's long reads*

Alignment statistics to latest Bos taurus assembly via minimap2<sup>2</sup>:

```
minimap2 -ax map-pb BtauARS.fasta Ndama.subreads.bam | samtools view - -S -h -  
b | samtools sort - -o ./Ndama.subreads_minimap.bam
```

Alignment statistics obtained through samtools<sup>3</sup> flagstat.

In total, reads (87.95%) were aligned to the reference genome.

Coverage obtained on the chromosomes (samtools depth) as the average of all bases within each chromosome.

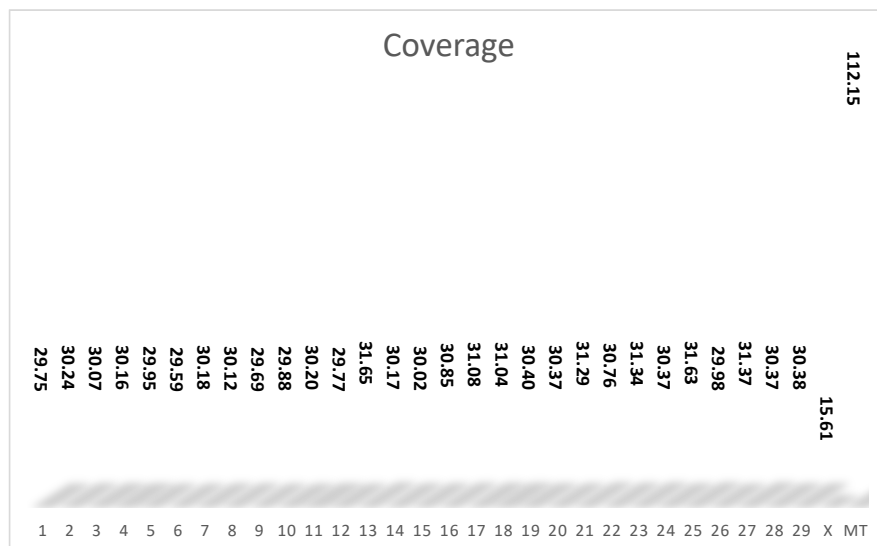

Coverage per chromosome of mapped PacBio reads



### *Assembly Selection*

We generated two different assemblies from two different software, CANU<sup>4</sup> and FALCON<sup>5</sup>. Different metrics used to select the genome for subsequent analysis.

| PARAMETER              | CANU          | FALCON        |
|------------------------|---------------|---------------|
| BP YIELD               | 2,624,985,022 | 2,644,771,833 |
| # SEQUENCES (POLISHED) | 5,940         | 4,115         |
| N25                    | 4,717,823     | 6,209,788     |
| N50                    | 2,636,435     | 3,275,473     |
| N75                    | 1,195,117     | 1,561,644     |
| N90                    | 328,738       | 477,322       |
| N95                    | 99,257        | 124,586       |
| L25                    | 93            | 78            |
| L50                    | 285           | 227           |
| L75                    | 652           | 518           |
| MIN L                  | 1,007         | 9,000         |
| AVG L                  | 442,266       | 641,623       |
| MEDIAN L               | 44,046        | 69,448        |
| MAX L                  | 21,377,347    | 18,329,644    |
| GC%                    | 41.95%        | 42.04%        |
| BUSCO COMPLETE*        | 77.90%        | 85.84%        |
| BUSCO FRAGMENTED*      | 14.00%        | 6.99%         |
| BUSCO MISSING*         | 8.10%         | 7.16%         |

Based on the metrics above, FALCON assembly have been selected since it shows a high contig metrics, bp yield and includes a filtering for highly repetitive regions. The resulting assembly has been polished twice using long reads with Racon, and once with short reads and Pilon v1.23<sup>6</sup>. Long reads were mapped using minimap2, whereas short reads were mapped using bwa mem.

Pilon polishing step allowed to fix multiple misassemblies, insertions, deletions, collapse repeated regions and trim low coverage bases. Below a short summary of the polishing step:

|                           | VALUE         |
|---------------------------|---------------|
| ORIGINAL SIZE             | 2,655,094,705 |
| BASES CONFIRMED           | 2,609,970,564 |
| BASES CONFIRMED (%)       | 98.30%        |
| CORRECTED SIZE            | 2,644,876,474 |
| SNPS CORRECTED            | 593,486       |
| INSERTIONS CORRECTED      | 5,129,742     |
| INSERTIONS CORRECTED (BP) | 8,254,027     |
| DELETIONS CORRECTED       | 566,769       |
| DELETIONS CORRECTED (BP)  | 686,240       |
| COLLAPSED BASES           | 11,721,029    |

After running Pilon on the assembly created using Falcon-Unzip, we run a completeness assessment using BUSCO<sup>7</sup> v3, with the assembly showing a good completeness (91%).

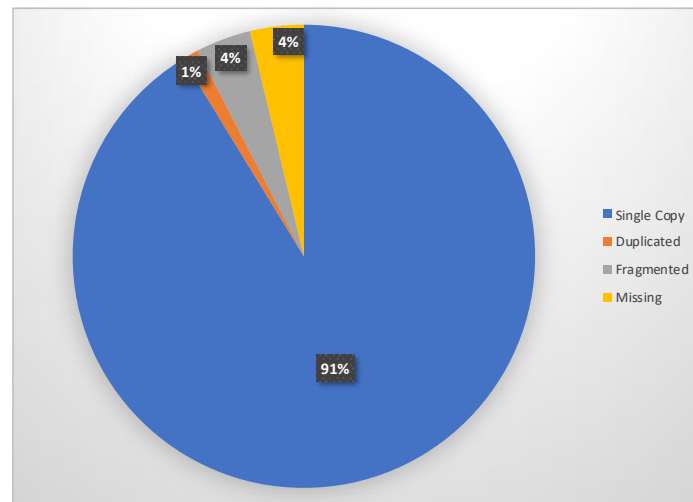

## Chromosome-level assembly

### *Ragout Scaffolding*

Lacking long-range sequencing data, we performed the scaffolding of the genome using a reference-assisted approach. Given the availability of multiple reference genomes available, we decided to adopt a multi-reference approach, which might help minimizing the bias introduced by the process. In particular, we decided to use the combination of SibeliaZ<sup>8</sup> v1.1.0 (<https://github.com/medvedevgroup/SibeliaZ/>) for the alignments and Ragout2<sup>9</sup> (<https://github.com/fenderglass/Ragout/>) for the scaffolding. We used three different references (ARS-UCD1.2, GCA\_003369685.2, GCA\_003369695.2, which are respectively Hereford, Angus and Brahman). Sequence names have been changed in the UCSC format (>spp.sequenceID; e.g. >hereford.1), matching the input fasta name.

No phylogenetic tree was provided to the software, leaving to Ragout to estimate the relationships from the alignments. The scaffolding has been performed separately for the autosomes, MT, X, Y and the other contigs and scaffolds. The process is represented in the figure below, with the different steps and the genomes used.

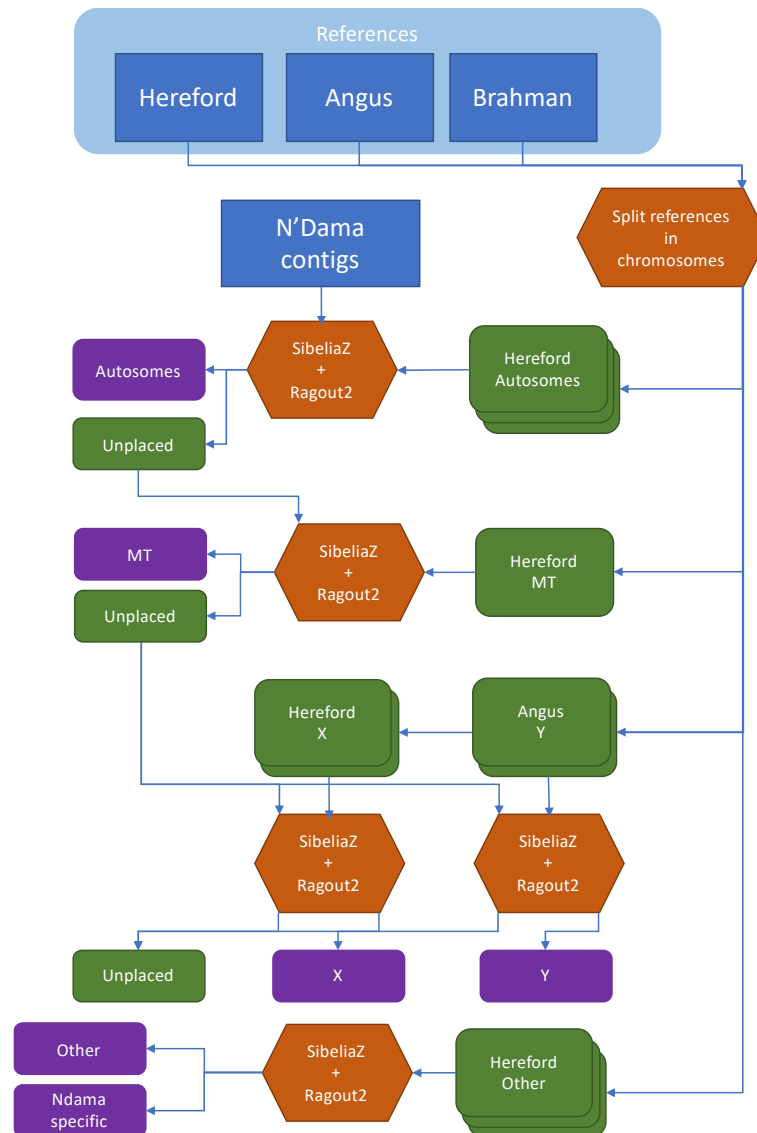

*Scheme of the scaffolding step: first, autosomes are scaffolded; the unplaced contigs are first used to create the MT genome, then the remaining used for both X and Y (the same set of contigs have been used to account for pseudoautosomal regions)*

SibeliaZ was run with a low k-mer size (-k 21) to use shorter Kmers, slowing down the alignments but increasing the sensitivity.

Most of the contigs are placed on the autosomes, leaving a total sequence length which is roughly the same size as the X chromosome. Worth noticing that one scaffold was identified as on chromosome 7, but the correct position could not be resolved at the time.

| BLOCK    | FRAGMENT USED | SCFLD LENGTH  | INTRODUCED N | INTRODUCED N (%) | UNPLACED FRAGMENTS | UNPLACED LENGTH | UNPLACED LENGTH (%) |
|----------|---------------|---------------|--------------|------------------|--------------------|-----------------|---------------------|
| AUTOSOME | 2,081         | 2,504,980,383 | 16,307,546   | 0.65%            | 2,564              | 156,203,637     | 5.91%               |
| X        | 2,194         | 155,751,820   | 64,638,795   | 41.50%           | 1,342              | 65,056,028      | 41.66%              |
| Y        | 640           | 47,396,136    | 8,747,893    | 18.46            | 2,157              | 117,520,810     | 75.25%              |
| MT       | 1             | 34,584        | 0            | 0.00             | 2,563              | 156,169,053     | 99.98%              |
| OTHER    | 0             | 0             | 0            | 0.00             | 1,177              | 62,647,416      | 100.00%             |

The sexual chromosomes present a particularly high number of missing bases, due to the lower coverage derived from the sequencing. Also, the mitogenome, presents twice the expected size. These were considered separately and fixed manually by orientating the fragments and including a gap of ~400 bp.

## Mitochondria misassembly resolution

### Approach description

Using the QUAST<sup>10</sup> report on the error corrected contigs, it is possible to identify the region of misassembly into the mitochondrial genome.

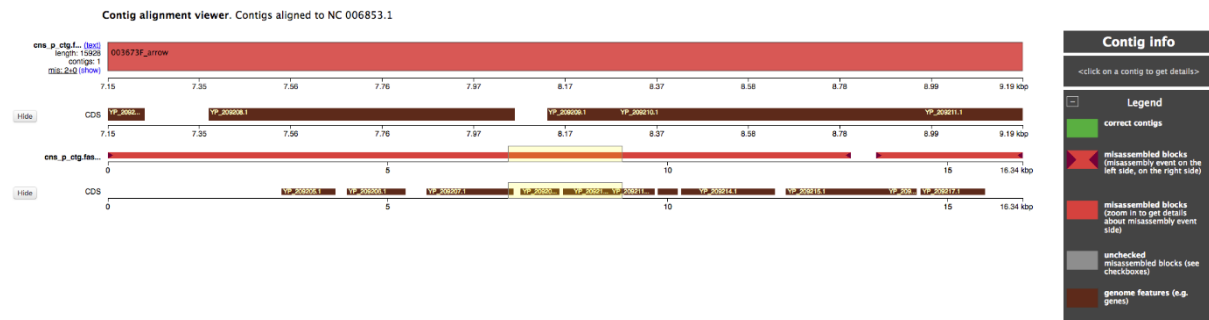

To solve the misassembly, assembled mitochondrial chromosome was aligned to the reference mitochondrial genome using minimap2. Paf alignments were converted to MAF (multiple alignment format). Sorted alignments were then joined manually including a 454 bp gap, reaching the final chromosomal genome length.

### Scaffold N/L statistics

We calculated some basic statistics of the new chromosome level assembly (Table below). As can be seen, the N50/L50 are high, as expected from a chromosome-level genome, and 90% of the total genome is included in the chromosomes.

| X   | NX          | LX  | NGX         | LGX | GC%   |
|-----|-------------|-----|-------------|-----|-------|
| 5   | 142,323,786 | 0   | 142,323,786 | 0   | 40.30 |
| 10  | 126,884,692 | 1   | 121,213,004 | 2   | 40.56 |
| 25  | 103,955,525 | 5   | 103,955,525 | 5   | 41.08 |
| 50  | 87,672,696  | 12  | 87,672,696  | 12  | 40.97 |
| 75  | 61,733,321  | 21  | 61,151,627  | 22  | 41.60 |
| 90  | 36,413,080  | 29  | 9,265,313   | 32  | 41.85 |
| 95  | 4,616,499   | 45  | 2,179,503   | 62  | 41.90 |
| 100 | 7,612       | 970 | 7,612       | 970 | 42.00 |

## Gap Filling

We improved the contiguity of the assembly through gap filling using the software LR\_GapCloser<sup>11</sup> v1.1. This software split the long reads into 300 bp chunks and map them to the scaffolds using bwa. After that step, it identifies the reads that cover mostly the gap, and use them to fill it. The gap fill stage has been repeated three times. As can be seen in table below, ~50% of the gaps and 34% of Ns have been properly filled:

| STAGE      | N GAPS | GAPS BP    | BASES         | ADDED BP | N50        | L50 |
|------------|--------|------------|---------------|----------|------------|-----|
| INITIAL    | 4,885  | 89,694,751 | 2,769,745,704 | 0        | 2,868,616  | 260 |
| ITERATION1 | 2,654  | 63,679,091 | 2,769,864,878 | 119,174  | 10,018,179 | 77  |
| ITERATION2 | 2,508  | 60,276,639 | 2,769,873,814 | 8,936    | 10,310,270 | 75  |
| ITERATION3 | 2,480  | 59,007,146 | 2,769,874,172 | 358      | 10414461   | 74  |

## Genome polishing

Following the gap filling, the genome needs to be finalized through a 5-fold polishing iteration using the short reads and Pilon (v1.23). Illumina short reads (coverage 78X) have been aligned using bwa mem algorithm in 18 chunks, combined with bamtools<sup>12</sup> 2.4.2 and sorted with samtools 1.9.

Below, a table summarising the changes introduced by multiple Pilon runs. Each iteration involved the remapping of the reads to the latest polished version of the assembly.

| PILON RUN | TOT CHANGES | INDELS (<=5BP) | INDELS (>5BP) | #SNP    | #GAPS FIXED |
|-----------|-------------|----------------|---------------|---------|-------------|
| 1         | 1,967,205   | 1,305,821      | 75,113        | 586,062 | 209         |
| 2         | 268,386     | 107,525        | 37,079        | 123,774 | 8           |
| 3         | 97,875      | 32,851         | 23,049        | 41,973  | 2           |
| 4         | 54,323      | 12,559         | 19,041        | 22,719  | 4           |
| 5         | 38,538      | 6,470          | 17,214        | 14,852  | 2           |

Every iteration reduces the number of changes needed by the assembly. The second Pilon run changed 25% SNPs changed in run 1 (120K vs 580K). The third run changed 33% of SNPs changed from run2 (42K vs 124K), and run 4 changed ~50% of SNPs changed in run3 (22K vs 42K). Similar pattern, but stronger, can be observed with the large indels, that at every iteration decrease massively (from >1,300K to ~12.5K from run 1 to 4). Short indels are less present, and therefore their reduction is less outstanding. However, since small insertions/deletions are a known issue in PacBio sequencing, having a low number of these events confirm that the polishing is proceeding in the right direction. Finally, the gaps fixed changes at every iteration. With the exception of the first, that fixed >200 small gaps, the number of gaps fixed in subsequent iterations depends on how much sequence is added in the previous step. Therefore, it can happen that iteration 4 fix more gaps than iteration 3 (4 vs 2).

## Genome evaluation

Contigs and scaffold metrics for the final assembled genome have been calculated using an in-house script. The quality value (QV) have been calculated using merquy<sup>13</sup> (<https://github.com/marbl/merquy>) on the k-mer counts generated with meryl 1.2 (<https://github.com/marbl/meryl>). QUAST-LG v5<sup>10</sup> (<http://quast.sourceforge.net>) and FRC\_Align ([https://github.com/vezzi/FRC\\_align](https://github.com/vezzi/FRC_align)) have been run to assess the genome using a separate reference and an independent evaluation through short reads sequencing. Coverage of the non-N sequence have been calculated with samtools.

### N'DAMA

|                            |             |
|----------------------------|-------------|
| <b>SCAFFOLDS N50</b>       | 104,847,410 |
| <b>SCAFFOLDS L50</b>       | 11          |
| <b>CONTIGS N50</b>         | 10,726,776  |
| <b>CONTIGS L50</b>         | 72          |
| <b>GAPS</b>                | 2,425       |
| <b>QUAST GENOME FRACT.</b> | 93.9        |
| <b>QUAST MISASSEMBLIES</b> | 7,050       |
| <b>AUTOSOMAL GAPS</b>      | 792         |
| <b>QV</b>                  | 34.3        |
| <b>QV (AUTOSOMES)</b>      | 37.9        |

The final busco assembly shows 94% of completeness, of which 92.6% in single copy.

| <b>BUSCO</b>        | <b>N</b> | <b>%GE</b> |
|---------------------|----------|------------|
| <b>COMPLETE</b>     | 3860     | 94.1%      |
| <b>COMPLETE (S)</b> | 3801     | 92.6%      |
| <b>COMPLETE (D)</b> | 59       | 1.4%       |
| <b>FRAGMENTED</b>   | 124      | 3.0%       |
| <b>MISSING</b>      | 120      | 2.9%       |
| <b>TOTAL</b>        | 4104     | 100.0%     |

Coverage plots for the assembly showing the highest level of coverage around the value of 84X (expected = 80X).

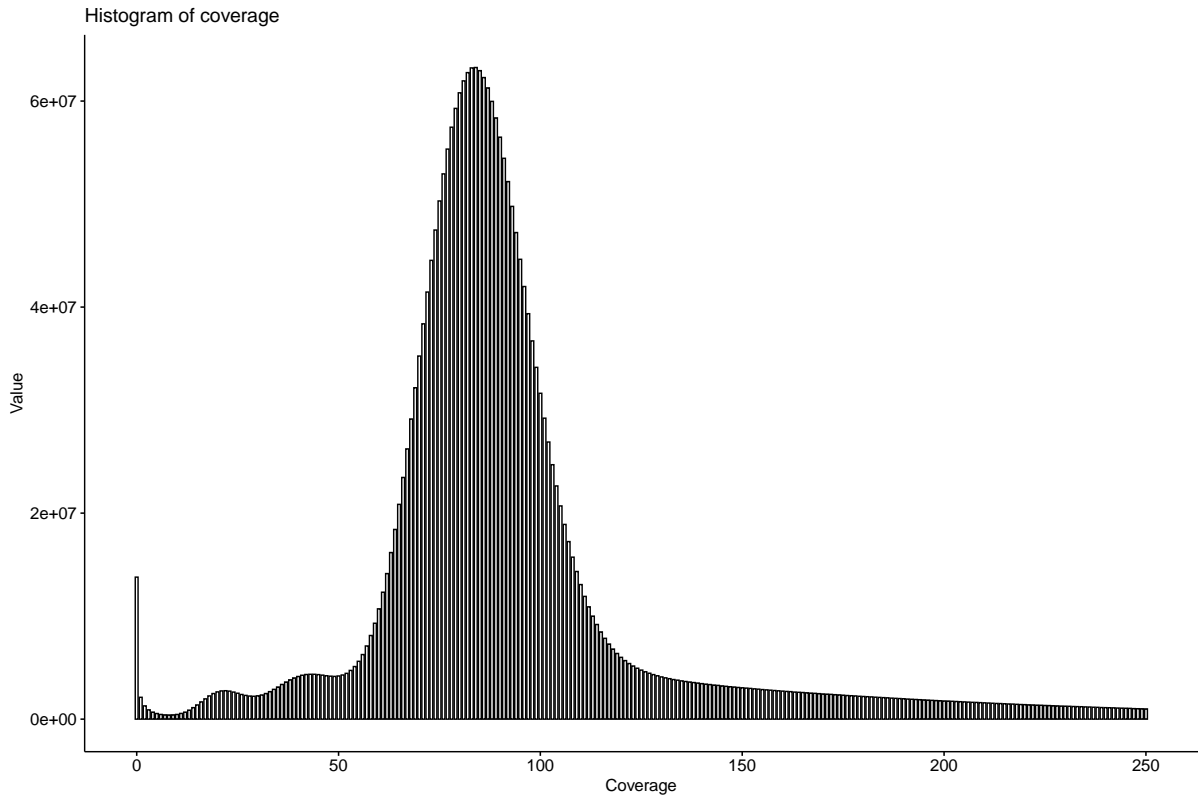

Feature response curve generate through FRC\_Align for the assembly is reported below.

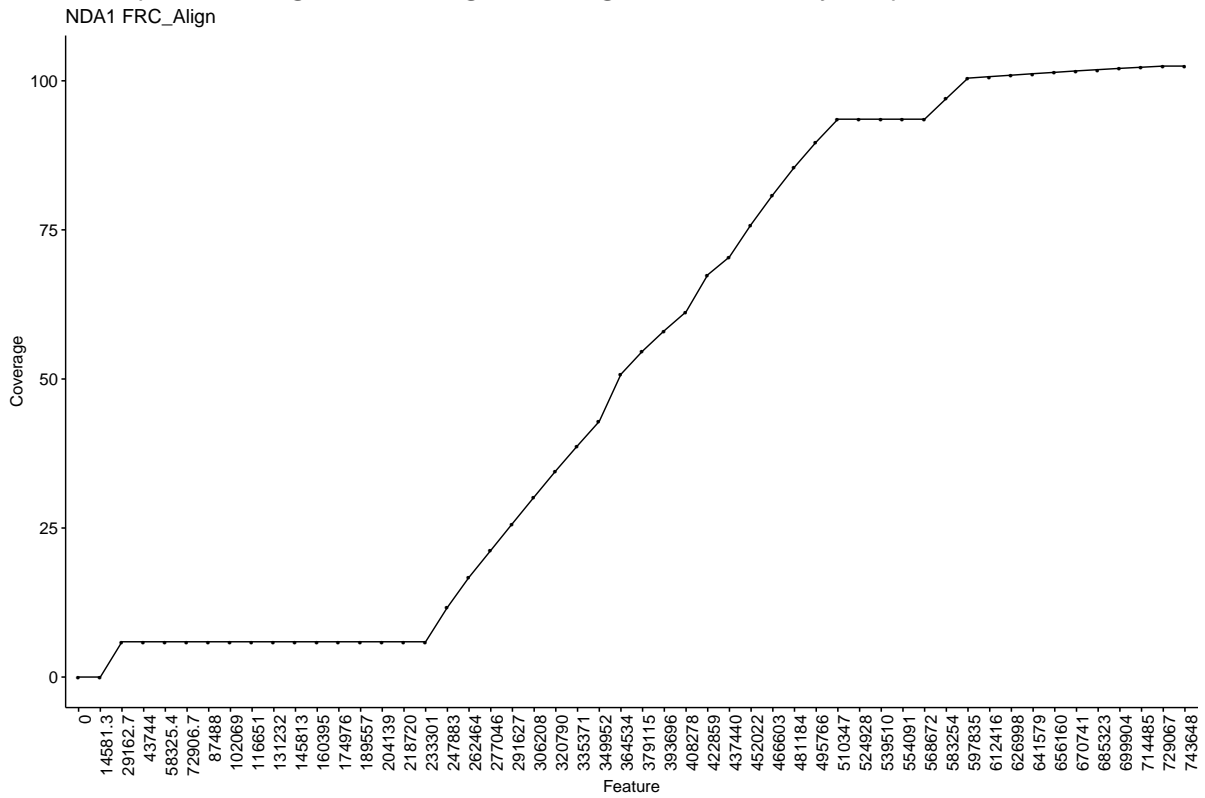

### Repetitive region detection and masking

Following the generation of the genome we performed the masking of the repetitive elements. To identify and mask the repetitive regions, we use a combination of:

1. Dustmasker from NCBI blast+<sup>14</sup> tool, to mask low-complexity repetitions
2. Windowmasker, to mask interspersed repeats
3. RepeatMasker<sup>15</sup>, that mask interspersed repeats, but that also include trf to mask low-complexity regions

This software generate a bed file with the position of all the repetitive elements in the genome that are then masked using bedtools<sup>16</sup> maskfasta function.

The run of the tools is scattered over multiple jobs, each processing several contigs, to speed up the process. Results from RepeatMasker are then summarised using in-house python script.

### Code availability

All scripts used to generate the assembly are available on GitHub

<https://github.com/evotools/CattleGraphGenomePaper/tree/master/Assembly/NDA1>.



## Supplementary Note 2 – In-depth description of the Ankole assembly process, with detailed metrics and processes

### Ankole long read sequencing

#### *Raw Sequel reads metrics*

In table below, there are the metrics for the raw PacBio Sequel subreads.

| Parameter     | Value           |
|---------------|-----------------|
| #Reads        | 9,781,220       |
| Sum           | 103,164,533,592 |
| Coverage      | 38.21           |
| Minimum       | 50              |
| Maximum       | 134,087         |
| Mean          | 10,547.21       |
| Standard dev. | 8,851.69        |
| Median        | 8,448           |
| IQR           | 12,813          |

Table 1 – Raw reads base statistics

These parameters confirm the general coverage (~40X) and that the reads seems to have a good median length.

Below, Figure 1 shows the read lengths distribution:

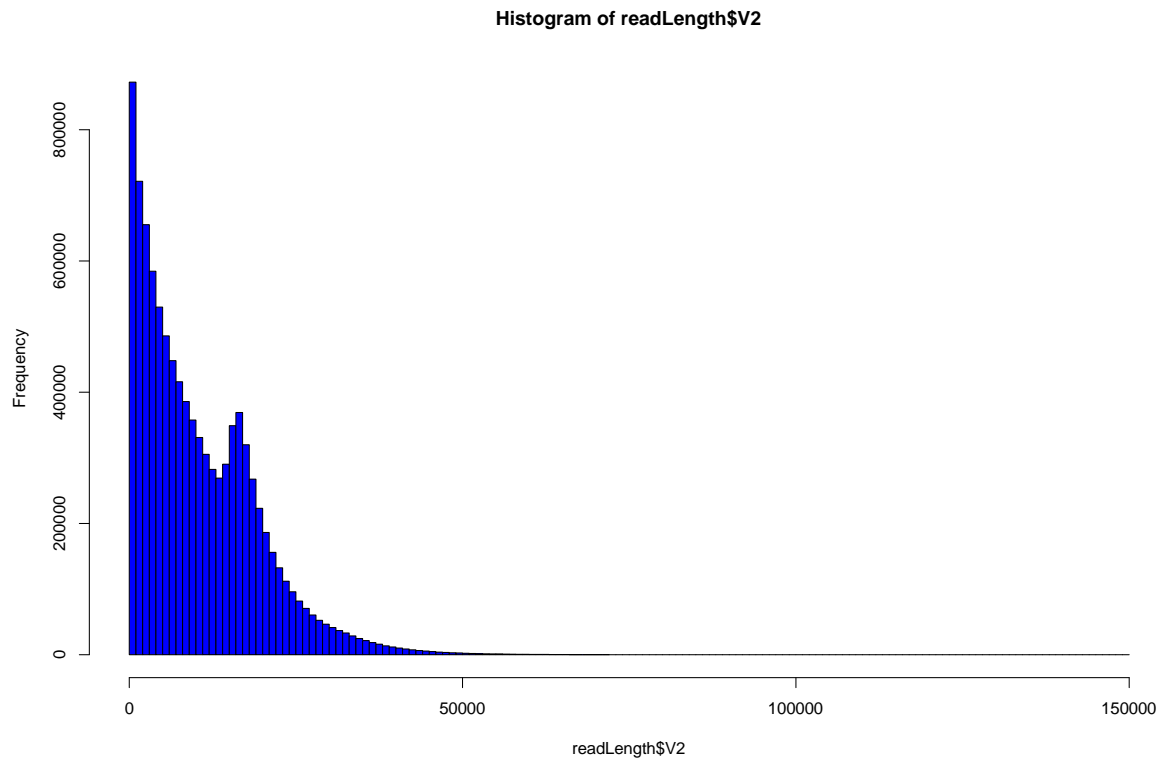

Figure 1 – Read lengths distribution

Analogously to the N'Dama assembly, the reads shows a bimodal distribution, with a first peak to low lengths (<1Kb) and a second at ~17Kb.

## Assembly

We generated two different assemblies using two different assemblers: CANU and WTDBG2. The scripts used to generate the two genomes are reported in GitHub repository. Both assemblies have been polished through WTPOA-cns tool included with the WTDBG2<sup>17</sup> software. The table below shows the differences between the two assembled genomes.

| PARAMETER         | WTDBG2        | CANU          |
|-------------------|---------------|---------------|
| N50               | 2,325,045     | 1,800,361     |
| L50               | 329           | 441           |
| BP yielded        | 2,703,598,714 | 2,807,643,510 |
| # Sequences       | 10,809        | 10,545        |
| BUSCO Complete*   | 89.6%         | 84.5%         |
| BUSCO Fragmented* |               |               |
| BUSCO Missing*    |               |               |

### *Assembler comparison*

Both CANU and WTDBG2 provided similar results, with contigs N50 above 1Mb with WTDBG2 showing a slightly higher N50 and lowest L50. Despite that, CANU<sup>4</sup> generated less contigs (300 contigs less) and a longer assembly size (2.8Gb vs 2.7Gb). Most of the statistics still need to be computed for CANU and FALCON, since the two assembler are respectively running the polishing step and generating the contigs.

## Assembly reconciliation tools

Following assembling the genomes, we tried to improve the contiguity of the genome by generating applying a genome reconciliation tool. We used quickmerge<sup>18</sup>, a software that relies on MUMmer<sup>19</sup> alignments filtered for repetitive regions, to detect the overlaps among contigs and combine them into new, longer sequences.

The genomes have been aligned using the nucmer tool in MUMmer4 suite, filtering all the repetitive regions.

The resulting alignments are then used as input for quickmerge, that has been run allowing length cutoff longer than the highest N50 (2.5Mb), considering a minimum alignment length of 50Kb (10X higher than the recommended threshold) and with very stringent cutoffs for the alignments considered for merging (hco > 15, 3X higher than the recommended; c > 5, 3.3X higher than the recommended; values are analogous to <sup>20</sup>).

|                    | Value         |
|--------------------|---------------|
| <b>BP yielded</b>  | 2,808,308,196 |
| <b>N50</b>         | 8,161,114     |
| <b>L50</b>         | 94            |
| <b>N sequences</b> | 9,270         |
| <b>GC%</b>         | 41.99         |

The procedure might have introduced misassemblies, or consolidated some that were present in both assemblies. The use of the Bionano optical mapping will likely fix the largest of these, breaking up chimeric contigs into smaller fragments.

## BioNano optical mapping scaffolding

### Software description

The generation of scaffolds have been performed using the optical mapping (OM) generated with the BioNano Saphyr machine. Molecules generated have been processed through the BioNano Solve 3.3 pipeline (version 7981).

The optical maps have first been assembled using the quickmerged assembly as reference, and then scaffolded using the hybrid scaffolding pipeline. The workflow introduced 956 cuts to 65 NGS sequences out of 9,271 (0.7% of the total; see table below for output from the conflict solution).

|                                                      | VALUE |
|------------------------------------------------------|-------|
| <b>NUMBER OF CONFLICT CUTS MADE TO BIONANO MAPS</b>  | 170   |
| <b>NUMBER OF CONFLICT CUTS MADE TO NGS SEQUENCES</b> | 956   |
| <b>NUMBER OF BIONANO MAPS TO BE CUT</b>              | 165   |
| <b>NUMBER OF NGS SEQUENCES TO BE CUT</b>             | 65    |

Eighteen out of the 65 contigs that need to be cut were above 2.5Mb, thirteen between 1Mb and 2.5Mb and 31 below 1Mb, with all contigs that had more than 5 cuts below the 1Mb threshold, suggesting the presence of misassemblies at the assembler level. More than 60% of the contigs (40/65) were split in two fragments, 24% in three fragments and the 15% in >4 fragments.

| CTG ID | CTG SIZE   | # FRAGMENTS | SMALLER FRAGMENT SIZE | LARGER FRAGMENT SIZE | ALL FRAGMENT SIZES                                      |
|--------|------------|-------------|-----------------------|----------------------|---------------------------------------------------------|
| 6399   | 235,114    | 10          | 2608                  | 120196               | 41052;7461;13523;12100;4012;2608;5415;26130;2608;120196 |
| 3144   | 163,846    | 9           | 2559                  | 115541               | 28708;2559;4002;2604;2608;2605;2605;2606;115541         |
| 2772   | 371,428    | 7           | 59                    | 158049               | 50584;40337;59;80208;17888;24297;158049                 |
| 3438   | 113,603    | 7           | 3989                  | 29329                | 27292;3989;7749;18511;22719;4008;29329                  |
| 637    | 794,184    | 5           | 59                    | 398055               | 163493;4325;228248;59;398055                            |
| 1731   | 887,286    | 5           | 21386                 | 443612               | 82670;79794;443612;21386;259820                         |
| 1915   | 811,417    | 4           | 10574                 | 559832               | 559832;10574;10846;230162                               |
| 9129   | 12,039,443 | 4           | 59                    | 8774036              | 3237364;27981;59;8774036                                |
| 9247   | 12,474,065 | 4           | 8208                  | 12092034             | 12092034;48131;8208;325689                              |
| 1147   | 1,585,356  | 3           | 23507                 | 1206018              | 355829;23507;1206018                                    |
| 1270   | 1,331,647  | 3           | 6379                  | 732968               | 732968;6379;592298                                      |
| 2109   | 322,094    | 3           | 22980                 | 245702               | 53410;22980;245702                                      |
| 2157   | 618,540    | 3           | 13853                 | 568760               | 35925;13853;568760                                      |
| 2322   | 453,240    | 3           | 9931                  | 302333               | 302333;9931;140974                                      |
| 3383   | 109,369    | 3           | 2608                  | 76059                | 30700;2608;76059                                        |
| 3428   | 142,634    | 3           | 4012                  | 94822                | 43798;4012;94822                                        |
| 5960   | 2,404,879  | 3           | 6436                  | 2001399              | 2001399;6436;397042                                     |
| 6007   | 609,323    | 3           | 39787                 | 490829               | 78705;39787;490829                                      |
| 6237   | 256,704    | 3           | 10727                 | 161749               | 161749;10727;84226                                      |
| 6413   | 88,473     | 3           | 4419                  | 58615                | 58615;4419;25437                                        |
| 8727   | 1,889,629  | 3           | 23394                 | 1472041              | 394192;23394;1472041                                    |
| 9094   | 50,349,372 | 3           | 6311                  | 28628641             | 21714418;6311;28628641                                  |
| 9143   | 21,002,380 | 3           | 32861                 | 13946044             | 13946044;32861;7023473                                  |
| 9194   | 2,812,833  | 3           | 28719                 | 2686466              | 97646;28719;2686466                                     |
| 9229   | 8,027,832  | 3           | 59                    | 4443568              | 3584203;59;4443568                                      |
| 8      | 4,496,967  | 2           | 1853501               | 2643465              | 1853501;2643465                                         |
| 72     | 181,619    | 2           | 32189                 | 149429               | 32189;149429                                            |

|             |            |   |         |          |                  |
|-------------|------------|---|---------|----------|------------------|
| <b>216</b>  | 182,234    | 2 | 46042   | 136191   | 46042;136191     |
| <b>594</b>  | 2,496,872  | 2 | 29398   | 2467473  | 29398;2467473    |
| <b>629</b>  | 1,263,114  | 2 | 23285   | 1239828  | 1239828;23285    |
| <b>800</b>  | 1,114,663  | 2 | 445969  | 668693   | 445969;668693    |
| <b>972</b>  | 1,878,577  | 2 | 235915  | 1642661  | 235915;1642661   |
| <b>1084</b> | 1,568,556  | 2 | 730844  | 837711   | 730844;837711    |
| <b>1312</b> | 1,409,293  | 2 | 104420  | 1304872  | 104420;1304872   |
| <b>1412</b> | 1,204,556  | 2 | 181058  | 1023497  | 1023497;181058   |
| <b>1868</b> | 876,811    | 2 | 106805  | 770005   | 770005;106805    |
| <b>2130</b> | 445,190    | 2 | 119237  | 325952   | 119237;325952    |
| <b>2447</b> | 381,485    | 2 | 90006   | 291478   | 291478;90006     |
| <b>2809</b> | 122,592    | 2 | 36774   | 85817    | 85817;36774      |
| <b>2968</b> | 122,937    | 2 | 43020   | 79916    | 79916;43020      |
| <b>3311</b> | 141,503    | 2 | 32150   | 109352   | 32150;109352     |
| <b>5993</b> | 1,182,297  | 2 | 64329   | 1117967  | 64329;1117967    |
| <b>6037</b> | 2,348,223  | 2 | 133913  | 2214309  | 2214309;133913   |
| <b>6058</b> | 245,737    | 2 | 60375   | 185361   | 60375;185361     |
| <b>6143</b> | 288,439    | 2 | 135856  | 152582   | 152582;135856    |
| <b>6168</b> | 508,293    | 2 | 51190   | 457102   | 457102;51190     |
| <b>6230</b> | 270,168    | 2 | 75577   | 194590   | 194590;75577     |
| <b>6251</b> | 210,208    | 2 | 98570   | 111637   | 98570;111637     |
| <b>6253</b> | 332,684    | 2 | 37785   | 294898   | 37785;294898     |
| <b>6256</b> | 405,643    | 2 | 36263   | 369379   | 36263;369379     |
| <b>6360</b> | 357,635    | 2 | 117202  | 240432   | 240432;117202    |
| <b>9103</b> | 13,274,084 | 2 | 54086   | 13219997 | 13219997;54086   |
| <b>9126</b> | 5,989,548  | 2 | 391061  | 5598486  | 391061;5598486   |
| <b>9133</b> | 5,315,080  | 2 | 136169  | 5178910  | 136169;5178910   |
| <b>9167</b> | 13,510,537 | 2 | 158305  | 13352231 | 158305;13352231  |
| <b>9182</b> | 5,134,164  | 2 | 1835694 | 3298469  | 3298469;1835694  |
| <b>9189</b> | 10,293,330 | 2 | 1722992 | 8570337  | 8570337;1722992  |
| <b>9193</b> | 6,841,681  | 2 | 102276  | 6739404  | 102276;6739404   |
| <b>9204</b> | 8,229,963  | 2 | 2445330 | 5784632  | 2445330;5784632  |
| <b>9206</b> | 4,142,798  | 2 | 1118188 | 3024609  | 3024609;1118188  |
| <b>9211</b> | 6,756,289  | 2 | 1091867 | 5664421  | 5664421;1091867  |
| <b>9219</b> | 9,152,709  | 2 | 742149  | 8410559  | 8410559;742149   |
| <b>9241</b> | 16,694,204 | 2 | 1420161 | 15274042 | 1420161;15274042 |
| <b>9252</b> | 8,673,619  | 2 | 254878  | 8418740  | 254878;8418740   |
| <b>9265</b> | 11,484,869 | 2 | 74937   | 11409931 | 74937;11409931   |

The resulting scaffolds, in comparison with the contig level assemblies, show the following metrics:

| Assembly   | Bp            | #Scf  | scfN50 (Mb) | #Ctg   | ctgN50    | ctgL50 | #Ns         | #Gaps | LongestGap |
|------------|---------------|-------|-------------|--------|-----------|--------|-------------|-------|------------|
| WTDBG2     | 2,703,598,714 | NA    | NA          | 10,809 | 2,325,045 | 329    | NA          | NA    | NA         |
| CANU       | 2,807,643,510 | NA    | NA          | 10,545 | 1,800,361 | 441    | NA          | NA    | NA         |
| QUICKMERGE | 2,808,308,196 | NA    | NA          | 9,270  | 8,161,114 | 94     | NA          | NA    | NA         |
| QKM_BNSCF  | 2,808,308,196 | 7,581 | 85.414      | 9,388  | 7,823,042 | 97     | 118,404,067 | 1,807 | 5,536,000  |

The next stage will be the gap filling and polishing of the genome generated from the Solve pipeline.

## Gap Filling

Following the definition of the scaffolded version of the genome, the next step to be performed is the gap filling in order to increase the contiguity of the assembly. We used the scaffolds generated starting from the quickmerge contigs and the raw PacBio long reads. The software used to perform this step is LR\_GapCloser<sup>11</sup>. The following table shows the results of each of the 3-fold gap-filling iterations, with the sequential improvements:

| Assembly          | Bp            | #Scf  | scfN50 | #Ctg   | ctgN50     | ctgL50 | #Ns         | #Gaps | LongestGap |
|-------------------|---------------|-------|--------|--------|------------|--------|-------------|-------|------------|
| WTDBG2            | 2,703,598,714 | NA    | NA     | 10,809 | 2,325,045  | 329    | NA          | NA    | NA         |
| CANU              | 2,807,643,510 | NA    | NA     | 10,545 | 1,800,361  | 441    | NA          | NA    | NA         |
| QUICKMERGE        | 2,808,308,196 | NA    | NA     | 9,270  | 8,161,114  | 94     | NA          | NA    | NA         |
| QKM_BNSCF         | 2,808,417,765 | 7,581 |        | 9,388  | 7,823,042  | 97     | 118,407,067 | 1,807 | 5,536,000  |
| QKM_BNSCF LRG (1) | 2,816,250,667 | 7,581 |        | 8,822  | 7,823,042  | 52     | 98,366,957  | 1,241 | 5,508,511  |
| QKM_BNSCF LRG (2) | 2,817,716,955 | 7,581 |        | 8,575  | 16,946,366 | 49     | 90,935,046  | 994   | 5,508,511  |
| QKM_BNSCF LRG (3) | 2,818,214,162 | 7,581 |        | 8,505  | 17,812,669 | 49     | 86,562,567  | 924   | 5,508,511  |

Next step in this analysis involves the polishing of the scaffolds, using Illumina short-reads, to further improve the overall quality of the genome.

## Genome polishing

Following the gap filling, the genome was finalized through 5-fold iterations of polishing through Pilon v1.23 with 78X Illumina short reads mapped scaffolded, gap-filled genome. Illumina short reads have then been aligned through bwa mem algorithm in 18 chunks, joined with bamtools<sup>12</sup> 2.4.2 and sorted with samtools<sup>3</sup> 1.9.

Below, a table summarising the changes introduced by multiple Pilon<sup>6</sup> runs. Each iteration involved the remapping of the reads to the latest polished version of the assembly.

| PILON RUN | TOT CHANGES | INDELS (<=5BP) | INDELS (>5BP) | #SNP    | #GAPS FIXED |
|-----------|-------------|----------------|---------------|---------|-------------|
| 1         | 4,099,358   | 3,385,056      | 135,069       | 579,233 | 7           |
| 2         | 428,490     | 207,288        | 66,250        | 154,952 | 8           |
| 3         | 155,155     | 72,104         | 31,409        | 51,642  | 4           |
| 4         | 75,285      | 23,964         | 26,429        | 24,892  | 1           |
| 5         | 50,588      | 12,951         | 23,749        | 13,888  | 1           |

Every iteration reduces the number of changes needed by the assembly. The number of gaps fixed in each iteration varies depending on the added sequence from the previous iteration.

## Chromosome assignment

### *Alignments and assignments*

Following completion of the assembly, we tried to identify which scaffolds corresponded to the autosomes, sexual chromosomes and mitogenome. To do so, we first aligned the scaffolds to the 1000 bull reference genome using minimap2. The resulting paf were then processed through a custom R scripts to extract the alignments that better suited each autosome. The result is reported in the table below, with most of the chromosomes corresponding to a single scaffold, with high percentage of identity:

| Query                 | Target | Aligned   | Tgt Length | Qry Length | Ratio Qry aligned | Ratio Tgt aligned |
|-----------------------|--------|-----------|------------|------------|-------------------|-------------------|
| Super-Scaffold_100001 | 1      | 155901980 | 158534110  | 156527526  | 0.9833971         | 0.9960036         |
| Super-Scaffold_100002 | 2      | 137697348 | 136231102  | 138302011  | 1.0107629         | 0.995628          |
| Super-Scaffold_100003 | 3      | 119614633 | 121005158  | 120813661  | 0.9885085         | 0.9900754         |
| Super-Scaffold_100005 | 4      | 118799771 | 120000601  | 119914157  | 0.9899931         | 0.9907068         |
| Super-Scaffold_100004 | 5      | 116688774 | 120089316  | 122124786  | 0.9716832         | 0.9554881         |
| Super-Scaffold_100007 | 6      | 111516922 | 117806340  | 112516630  | 0.9466122         | 0.991115          |
| Super-Scaffold_100008 | 7      | 109482276 | 110682743  | 110533585  | 0.989154          | 0.9904888         |
| Super-Scaffold_100006 | 8      | 112418051 | 113319770  | 114147848  | 0.9920427         | 0.984846          |
| Super-Scaffold_100010 | 9      | 104081408 | 105454467  | 104606559  | 0.9869796         | 0.9949798         |
| Super-Scaffold_100011 | 10     | 100737099 | 103308737  | 103296156  | 0.9751073         | 0.975226          |
| Super-Scaffold_100009 | 11     | 105979159 | 106982474  | 107065538  | 0.9906217         | 0.9898531         |
| Super-Scaffold_100012 | 12     | 83734362  | 87216183   | 89974165   | 0.9600783         | 0.9306489         |
| Super-Scaffold_9109   | 13     | 82263160  | 83472345   | 83163653   | 0.9855139         | 0.989172          |
| Super-Scaffold_9214   | 14     | 79091931  | 82403003   | 82216954   | 0.9598186         | 0.9619905         |
| Super-Scaffold_100013 | 15     | 81771760  | 85007780   | 84415766   | 0.9619327         | 0.9686788         |
| Super-Scaffold_100016 | 16     | 73121424  | 81013979   | 74962467   | 0.9025779         | 0.9754405         |
| Super-Scaffold_100017 | 17     | 72180629  | 73167244   | 72786150   | 0.9865156         | 0.9916808         |
| Super-Scaffold_9192   | 18     | 65305312  | 65820629   | 67291221   | 0.9921709         | 0.9704878         |
| Super-Scaffold_100021 | 19     | 62919788  | 63449741   | 63302509   | 0.9916477         | 0.9939541         |
| Super-Scaffold_100018 | 20     | 71188688  | 71974595   | 72406059   | 0.9890808         | 0.9831869         |
| Super-Scaffold_100019 | 21     | 68731579  | 69862954   | 70766496   | 0.9838058         | 0.9712446         |
| Super-Scaffold_100023 | 22     | 59638881  | 60773035   | 61182121   | 0.9813379         | 0.9747763         |
| Super-Scaffold_100024 | 23     | 50754560  | 52498615   | 52932239   | 0.966779          | 0.9588591         |
| Super-Scaffold_100022 | 24     | 62068383  | 62317253   | 62232639   | 0.9960064         | 0.9973606         |
| Super-Scaffold_100030 | 25     | 42510937  | 42350435   | 42999529   | 1.0037899         | 0.9886373         |
| Super-Scaffold_100025 | 26     | 50788676  | 51992305   | 51362451   | 0.9768499         | 0.9888289         |
| Super-Scaffold_100028 | 27     | 43889740  | 45612108   | 45509546   | 0.9622388         | 0.9644073         |
| Super-Scaffold_100029 | 28     | 37006736  | 45940150   | 42633662   | 0.8055423         | 0.8680168         |
| Super-Scaffold_100026 | 29     | 51374455  | 51098607   | 53282723   | 1.0053983         | 0.964186          |
| tig00008859_obj       | MT     | 35866     | 16340      | 36534      | 2.1949816         | 0.9817157         |
| tig00009004_obj       | MT     | 16102     | 16340      | 17364      | 0.9854345         | 0.9273209         |
| tig00009055_obj       | MT     | 16988     | 16340      | 17519      | 1.0396573         | 0.9696901         |

|                 |    |       |       |       |           |           |
|-----------------|----|-------|-------|-------|-----------|-----------|
| tig00009122_obj | MT | 14966 | 16340 | 16578 | 0.9159119 | 0.9027627 |
| tig00009170_obj | MT | 15444 | 16340 | 17012 | 0.9451652 | 0.9078298 |
| tig00009193_obj | MT | 13312 | 16340 | 16003 | 0.8146879 | 0.831844  |
| tig00009207_obj | MT | 13443 | 16340 | 14566 | 0.822705  | 0.9229027 |
| tig00009254_obj | MT | 14195 | 16340 | 15426 | 0.8687271 | 0.9201997 |

The lower identity of chromosome 28 can be linked to the presence of a large gap (>5Mb) reducing the total alignments percentage. Mitogenome has been assembled multiple times in several contigs. The one closer in size to the actual mitogenome is *tig00009055\_obj*, which we suggest as the actual mitochondrial genome. Finally, both X and Y have not been properly scaffolded. They are covered by a various number of scaffolds and/or contigs, and never reaching the total expected chromosomal length.

### Genome evaluation

Contigs and scaffold metrics for the final assembled genome have been calculated using an in-house script. The quality value (QV) have been calculated using merqury<sup>13</sup> (<https://github.com/marbl/merqury>) on the k-mer counts generated with meryl 1.2 (<https://github.com/marbl/meryl>). QUAST-LG v5<sup>10</sup> (<http://quast.sourceforge.net>) and FRC\_Align ([https://github.com/vezzi/FRC\\_align](https://github.com/vezzi/FRC_align)) have been run to assess the genome using a separate reference and an independent evaluation through short reads sequencing. Coverage of the non-N sequence have been calculated with samtools.

### ANKOLE

|                            |            |
|----------------------------|------------|
| <b>SCAFFOLDS N50</b>       | 84,415,766 |
| <b>SCAFFOLDS L50</b>       | 12         |
| <b>CONTIGS N50</b>         | 18,610,934 |
| <b>CONTIGS L50</b>         | 49         |
| <b>GAPS</b>                | 904        |
| <b>AUTOSOMAL GAPS</b>      | 296        |
| <b>QUAST GENOME FRACT.</b> | 94.0%      |
| <b>QUAST MISASSEMBLIES</b> | 5,907      |
| <b>QV</b>                  | 30.6       |
| <b>QV (AUTOSOMES)</b>      | 34.2       |

The final busco assembly shows 93% of completeness, of which 91.0% in single copy.

| <b>BUSCO</b>                | <b>N</b> | <b>%GE</b> |
|-----------------------------|----------|------------|
| <b>COMPLETE</b>             | 3819     | 93.1%      |
| <b>COMPLETE (SINGLE)</b>    | 3733     | 91.0%      |
| <b>COMPLETE (DUPLICATE)</b> | 86       | 2.1%       |
| <b>FRAGMENTED</b>           | 125      | 3.0%       |
| <b>MISSING</b>              | 160      | 3.9%       |
| <b>TOTAL</b>                | 4104     | 100.0%     |

The coverage plot shows the highest coverage at 89X.

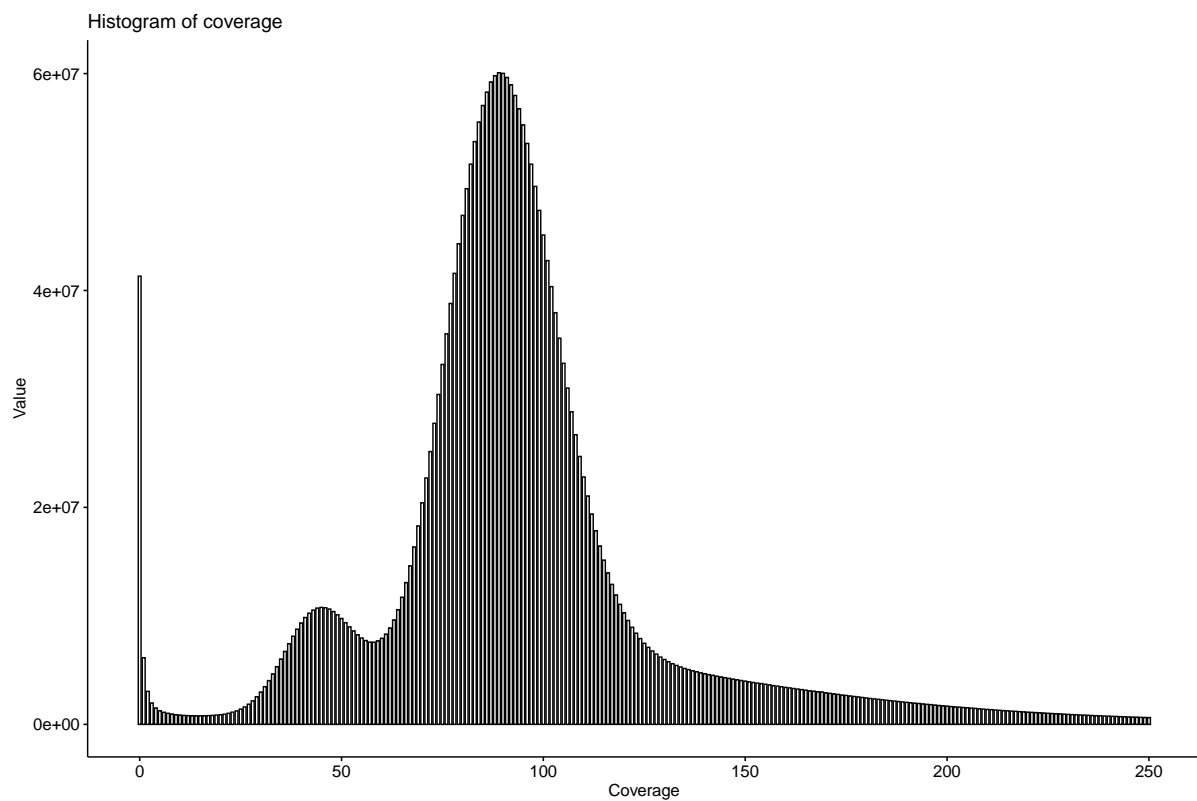

The unusual increase in lower coverage is due to the sparse unplaced contigs, and when removed the second peak almost disappear:



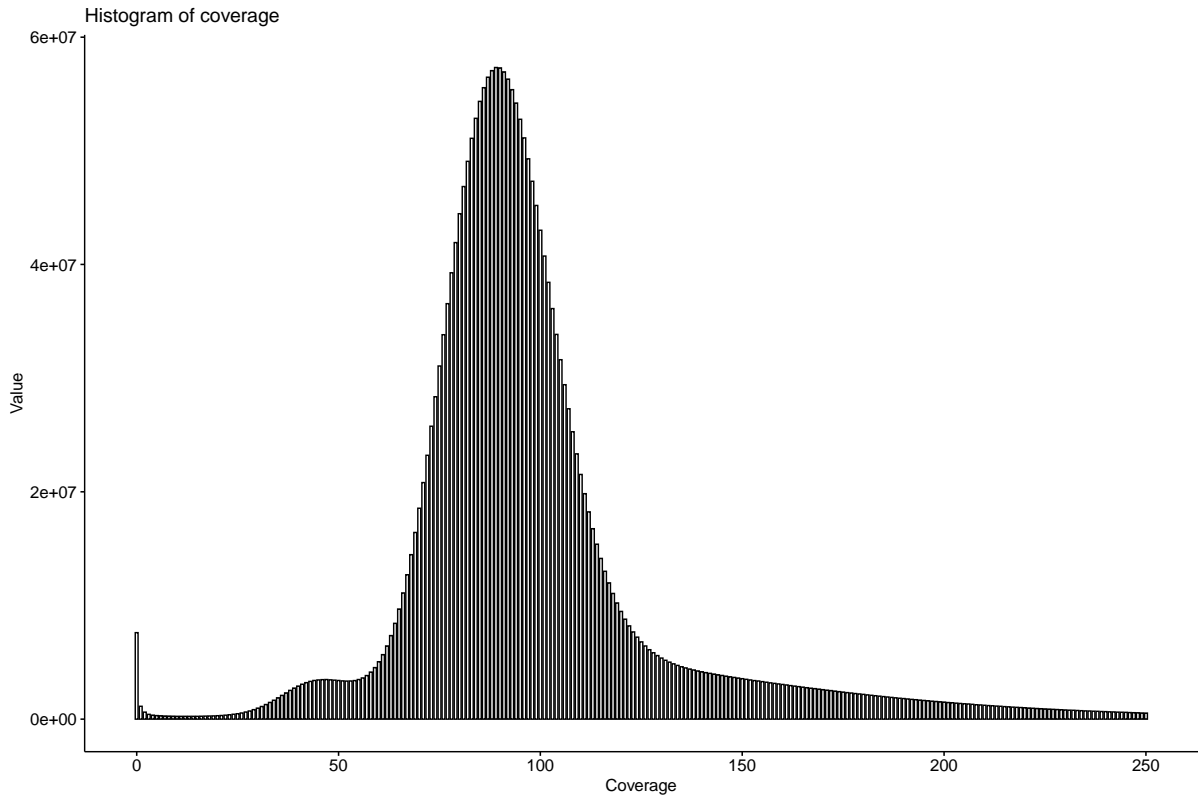

The Feature Response Curve generated with FRC\_Align is reported below.

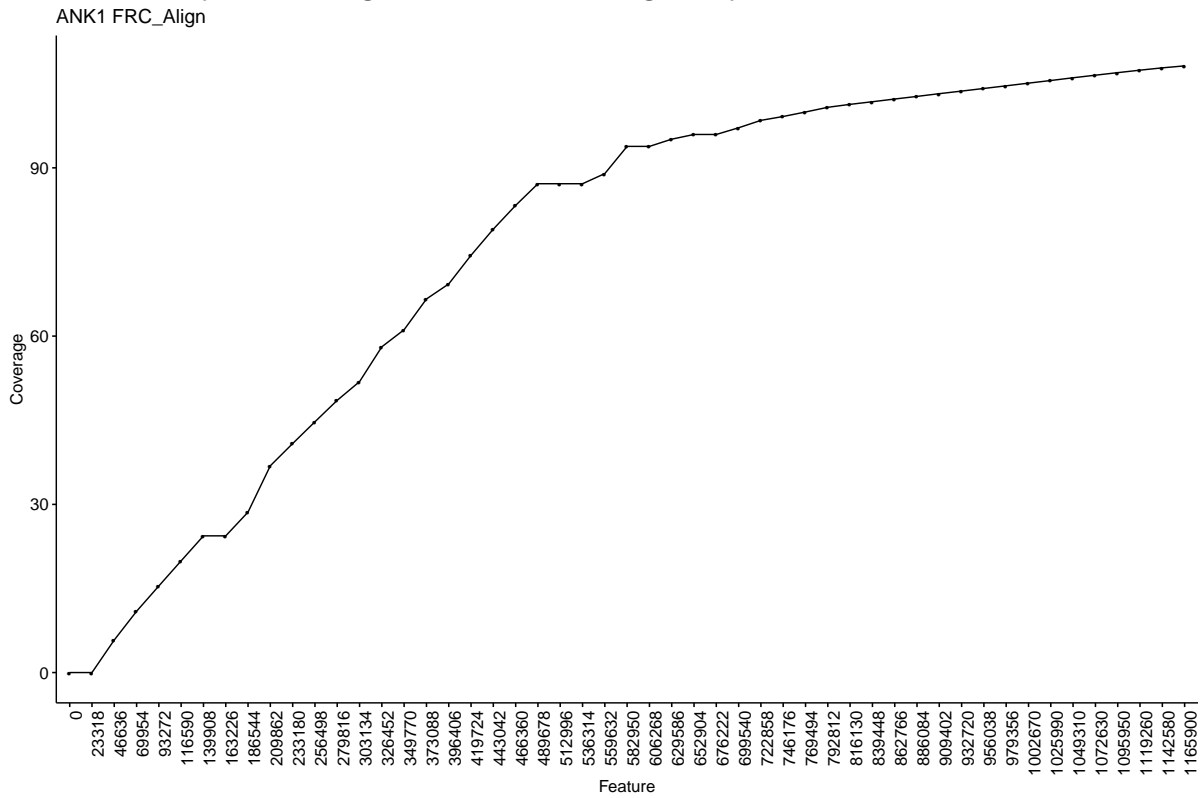

### Repetitive region detection and masking

Following the generation of the genome we performed the masking of the repetitive elements. To identify and mask the repetitive regions, we use a combination of:

1. Dustmasker from NCBI blast+ tool, to mask low-complexity repetitions
2. Windowmasker, to mask interspersed repeats
3. RepeatMasker<sup>15</sup>, that mask interspersed repeats, but that also include trf to mask low-complexity regions

This software generate a bed file with the position of all the repetitive elements in the genome that are then masked using bedtools<sup>16</sup> maskfasta function.

The run of the tools is scattered over multiple jobs, each processing several contigs, to speed up the process. Results from RepeatMasker are then summarised using in-house python script.

### Code availability

All scripts used to generate the assembly are available on GitHub

<https://github.com/evotools/CattleGraphGenomePaper/tree/master/Assembly/ANK1>

Supplementary Note 3 – Collection of figures describing the quality metrics of variants called using FreeBayes, GATK4, VG on a linear graph (VG1), VG on a graph with 11M variants from Dutta et al 2020 (VG1p), VG on a CACTUS-derived graph incorporating 5 different assemblies, VG on the VG5 graph expanded with the 11M variants included in VG1p (VG5p).

### Number of variants

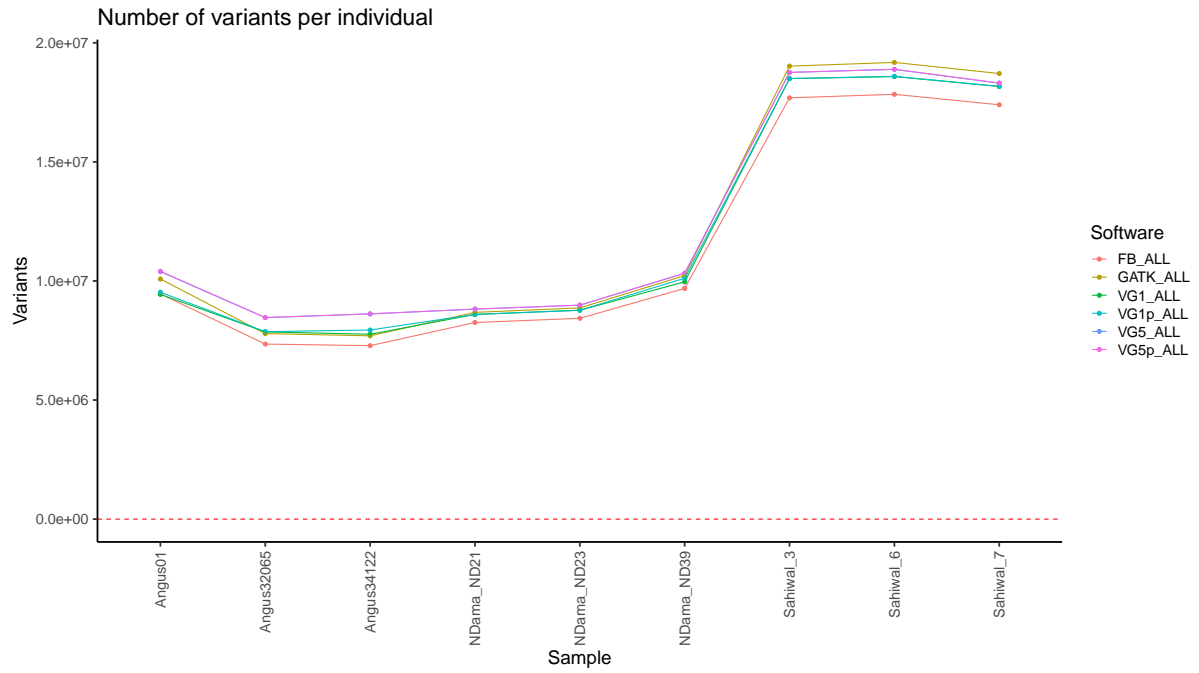

Variant number by individual and algorithm

| ALGORITHM | SIZE   | Angus      |            |            | N'Dama     |            |            | Sahiwal    |            |            |
|-----------|--------|------------|------------|------------|------------|------------|------------|------------|------------|------------|
|           |        | Angus01    | Angus32065 | Angus34122 | NDama ND21 | NDama ND23 | NDama ND39 | Sahiwal 3  | Sahiwal 6  | Sahiwal 7  |
| FB        | 0      | 9,433,407  | 8,680,825  | 8,647,275  | 10,293,619 | 10,427,815 | 11,365,489 | 22,267,905 | 21,961,629 | 21,134,702 |
|           | 30     | 1,247,675  | 1,291,245  | 1,286,982  | 1,459,222  | 1,465,023  | 1,528,898  | 2,601,979  | 2,563,991  | 2,465,586  |
|           | 100    | 699        | 978        | 912        | 5,096      | 5,147      | 5,258      | 11,094     | 10,589     | 10,292     |
|           | 500    | 0          | 0          | 0          | 0          | 0          | 0          | 0          | 0          | 0          |
|           | 1000   | 0          | 0          | 0          | 0          | 0          | 0          | 0          | 0          | 0          |
|           | 5000   | 0          | 0          | 0          | 0          | 0          | 0          | 0          | 0          | 0          |
|           | >=5001 | 0          | 0          | 0          | 0          | 0          | 0          | 0          | 0          | 0          |
| GATK      | 0      | 9,714,748  | 9,122,613  | 9,062,461  | 10,781,189 | 10,925,493 | 11,938,304 | 23,933,608 | 23,600,031 | 22,705,447 |
|           | 30     | 1,410,833  | 1,390,929  | 1,365,907  | 1,648,530  | 1,658,077  | 1,741,077  | 2,916,412  | 2,880,400  | 2,791,150  |
|           | 100    | 11,414     | 13,255     | 12,474     | 18,693     | 18,947     | 20,196     | 38,075     | 37,585     | 36,361     |
|           | 500    | 598        | 829        | 731        | 2,040      | 2,007      | 2,082      | 3,840      | 3,609      | 3,593      |
|           | 1000   | 0          | 0          | 0          | 0          | 0          | 0          | 0          | 0          | 0          |
|           | 5000   | 0          | 0          | 0          | 0          | 0          | 0          | 0          | 0          | 0          |
|           | >=5001 | 0          | 0          | 0          | 0          | 0          | 0          | 0          | 0          | 0          |
| VG1       | 0      | 9,310,979  | 9,146,153  | 8,982,935  | 10,637,904 | 10,779,804 | 11,644,564 | 23,176,834 | 22,793,550 | 21,995,140 |
|           | 30     | 1,202,143  | 1,200,398  | 1,180,741  | 1,403,965  | 1,413,178  | 1,499,336  | 2,515,032  | 2,495,894  | 2,409,959  |
|           | 100    | 503        | 753        | 623        | 3,521      | 3,587      | 3,611      | 7,785      | 7,263      | 7,530      |
|           | 500    | 0          | 0          | 0          | 0          | 0          | 0          | 0          | 0          | 0          |
|           | 1000   | 0          | 0          | 0          | 0          | 0          | 0          | 0          | 0          | 0          |
|           | 5000   | 0          | 0          | 0          | 0          | 0          | 0          | 0          | 0          | 0          |
|           | >=5001 | 0          | 0          | 0          | 0          | 0          | 0          | 0          | 0          | 0          |
| VG1P      | 0      | 9,426,559  | 9,161,053  | 9,195,152  | 10,642,495 | 10,782,819 | 11,803,691 | 23,192,625 | 22,817,076 | 22,009,622 |
|           | 30     | 1,202,013  | 1,203,250  | 1,207,983  | 1,406,005  | 1,415,432  | 1,504,931  | 2,519,744  | 2,500,724  | 2,413,828  |
|           | 100    | 552        | 814        | 685        | 3,580      | 3,620      | 3,851      | 7,940      | 7,421      | 7,664      |
|           | 500    | 8          | 8          | 3          | 6          | 6          | 5          | 12         | 13         | 12         |
|           | 1000   | 0          | 0          | 0          | 0          | 0          | 0          | 0          | 0          | 0          |
|           | 5000   | 0          | 0          | 0          | 0          | 0          | 0          | 0          | 0          | 0          |
|           | >=5001 | 0          | 0          | 0          | 0          | 0          | 0          | 0          | 0          | 0          |
| VG5       | 0      | 10,384,667 | 9,830,558  | 9,956,794  | 10,963,951 | 11,081,224 | 12,099,440 | 23,604,880 | 23,263,468 | 22,289,674 |
|           | 30     | 1,362,140  | 1,350,017  | 1,363,988  | 1,564,503  | 1,575,635  | 1,683,092  | 2,786,138  | 2,767,011  | 2,650,831  |
|           | 100    | 14,155     | 14,868     | 14,089     | 17,711     | 17,992     | 19,057     | 32,716     | 32,308     | 31,196     |
|           | 500    | 8,947      | 8,943      | 8,665      | 10,028     | 10,119     | 10,739     | 16,620     | 16,619     | 16,134     |
|           | 1000   | 2,632      | 2,510      | 2,475      | 2,607      | 2,610      | 2,858      | 4,279      | 4,208      | 4,089      |
|           | 5000   | 3,357      | 3,266      | 3,227      | 3,317      | 3,268      | 3,550      | 4,981      | 4,943      | 4,871      |
|           | >=5001 | 343        | 340        | 341        | 387        | 359        | 382        | 447        | 436        | 443        |
| VG5P      | 0      | 10,404,632 | 9,834,954  | 9,961,919  | 10,968,870 | 11,084,581 | 12,101,691 | 23,613,489 | 23,274,904 | 22,299,958 |
|           | 30     | 1,361,051  | 1,349,330  | 1,362,827  | 1,563,403  | 1,574,625  | 1,681,623  | 2,782,881  | 2,764,108  | 2,647,688  |
|           | 100    | 14,128     | 14,865     | 14,117     | 17,731     | 17,984     | 19,023     | 32,740     | 32,317     | 31,201     |
|           | 500    | 8,962      | 8,941      | 8,655      | 10,030     | 10,105     | 10,724     | 16,558     | 16,580     | 16,095     |
|           | 1000   | 2,619      | 2,506      | 2,475      | 2,617      | 2,605      | 2,853      | 4,259      | 4,187      | 4,085      |
|           | 5000   | 3,368      | 3,230      | 3,218      | 3,299      | 3,268      | 3,542      | 4,931      | 4,939      | 4,834      |
|           | >=5001 | 345        | 347        | 341        | 386        | 356        | 377        | 449        | 437        | 444        |

# Scenario A: 11M variants as known

## Variant number by size

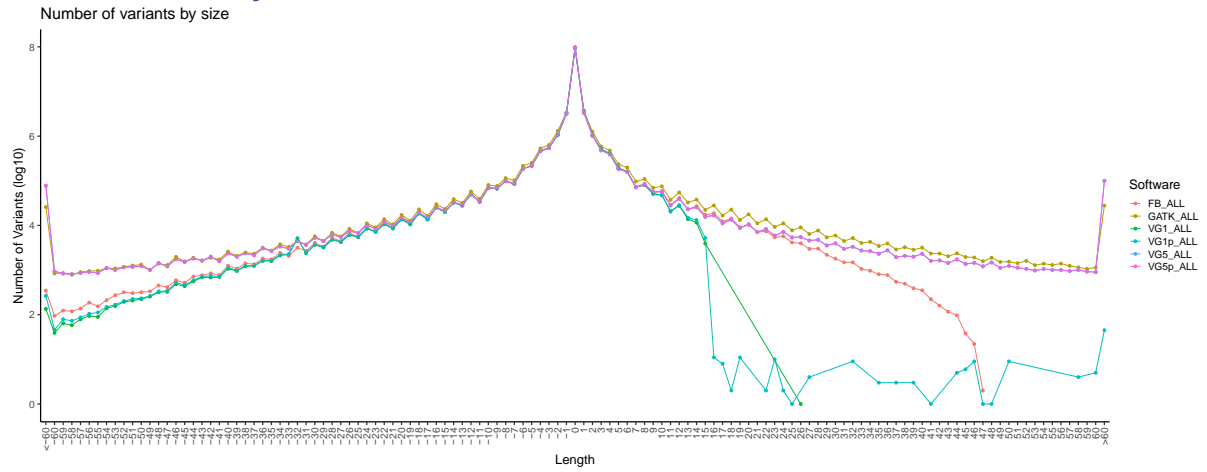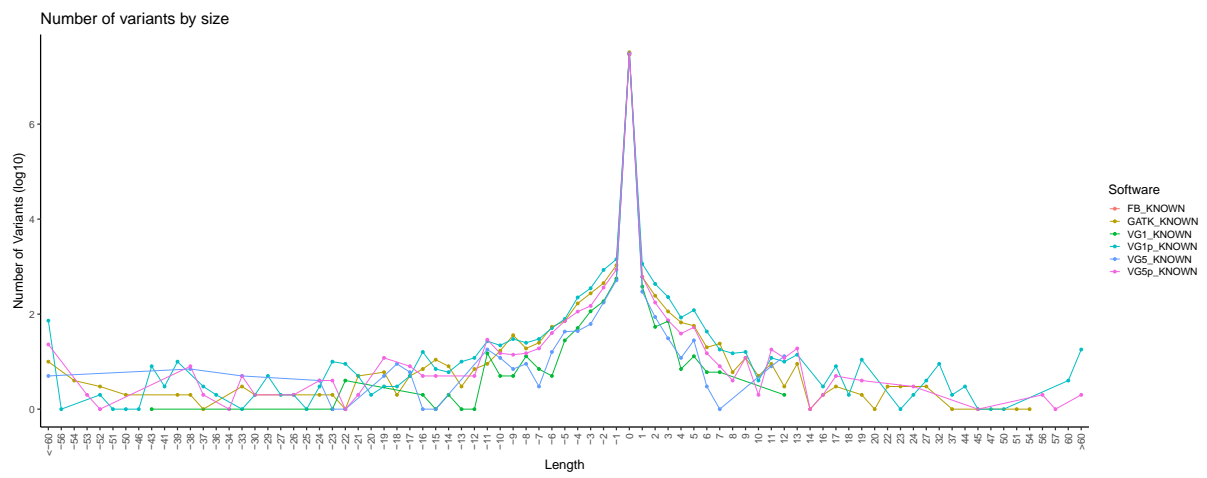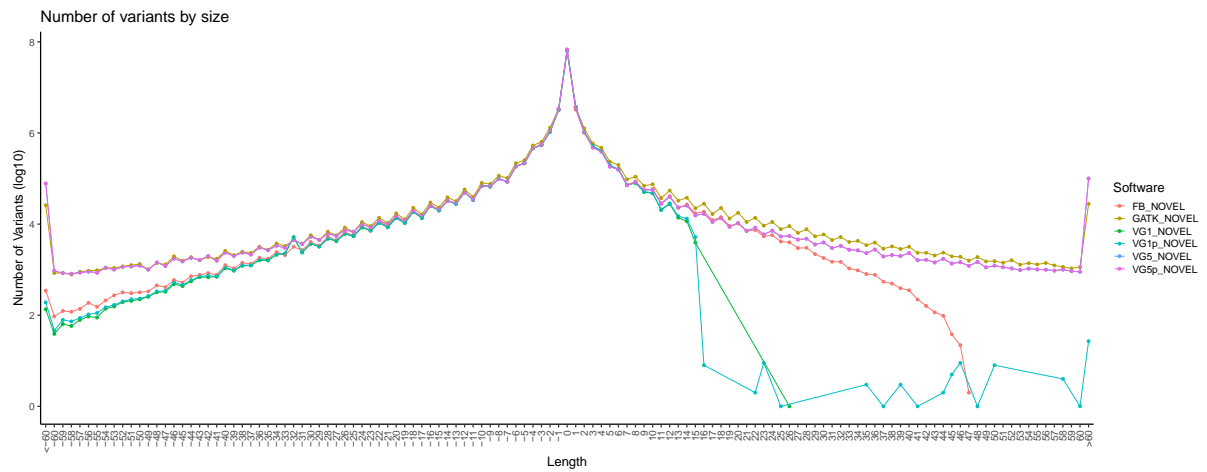

# Variant QUAL by Size

Standardized QUAL value by variant size

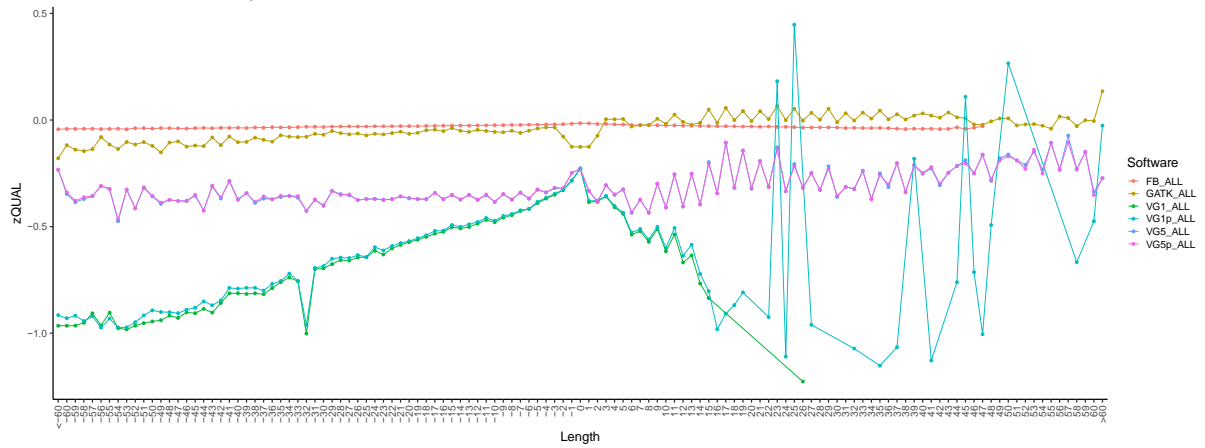

Standardized QUAL value by variant size

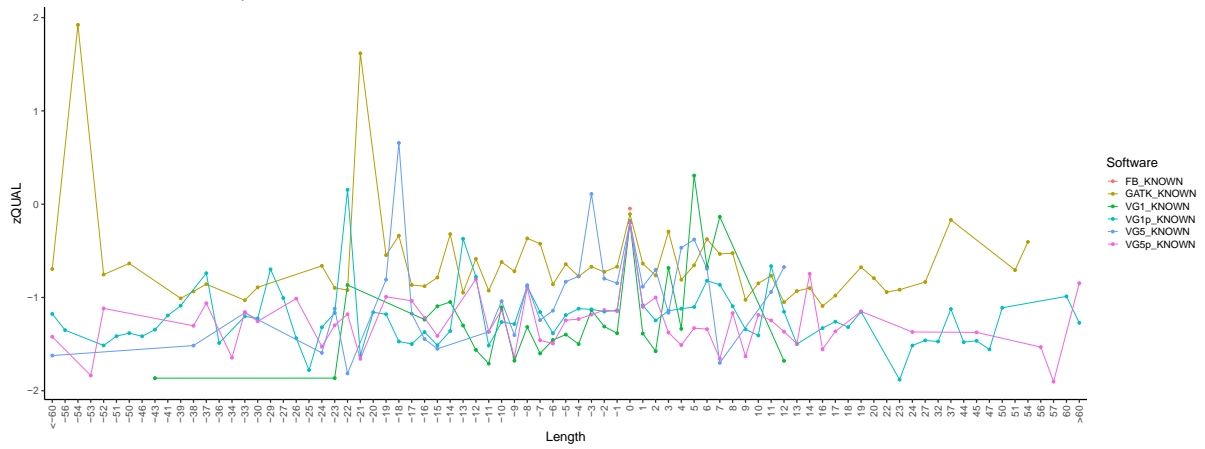

Standardized QUAL value by variant size

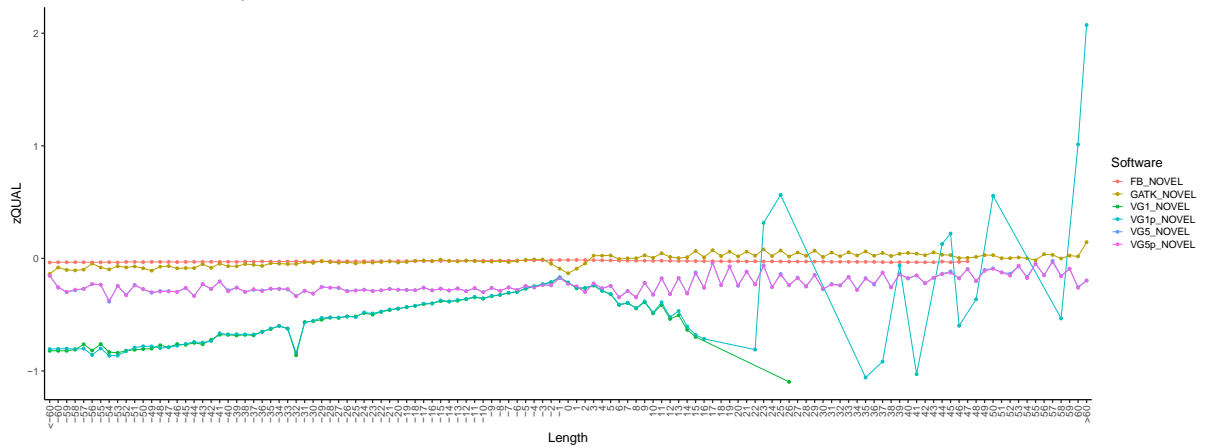

# Variant Depth by Size

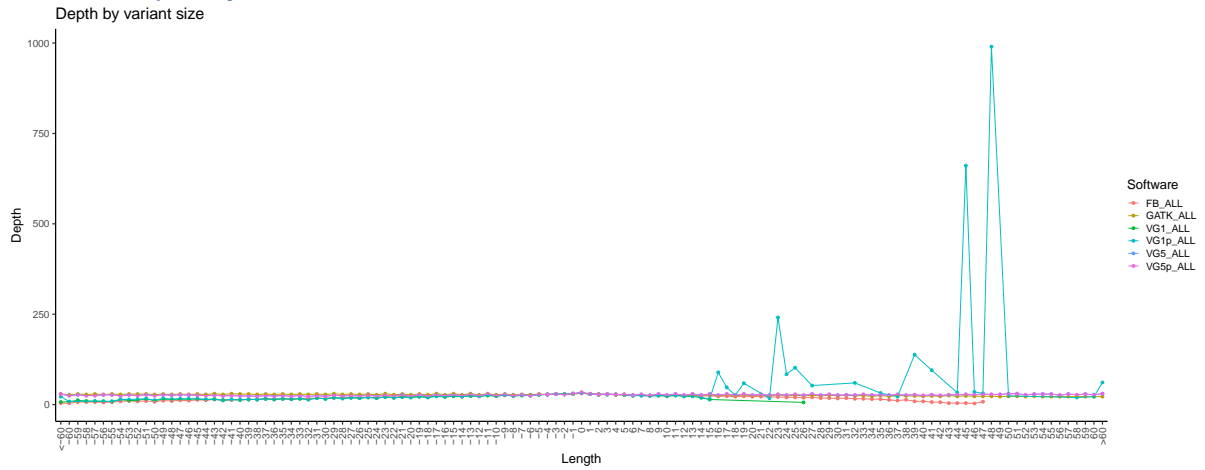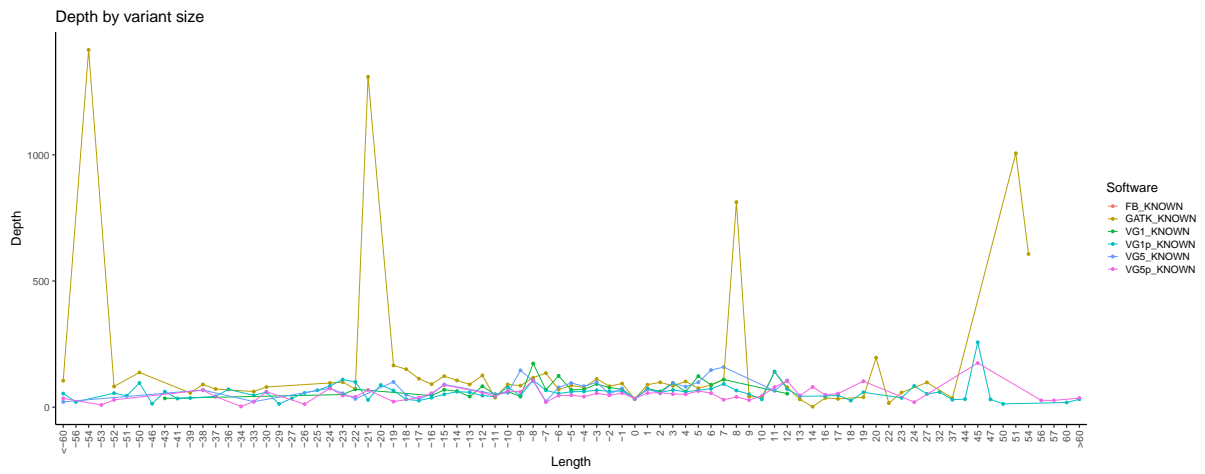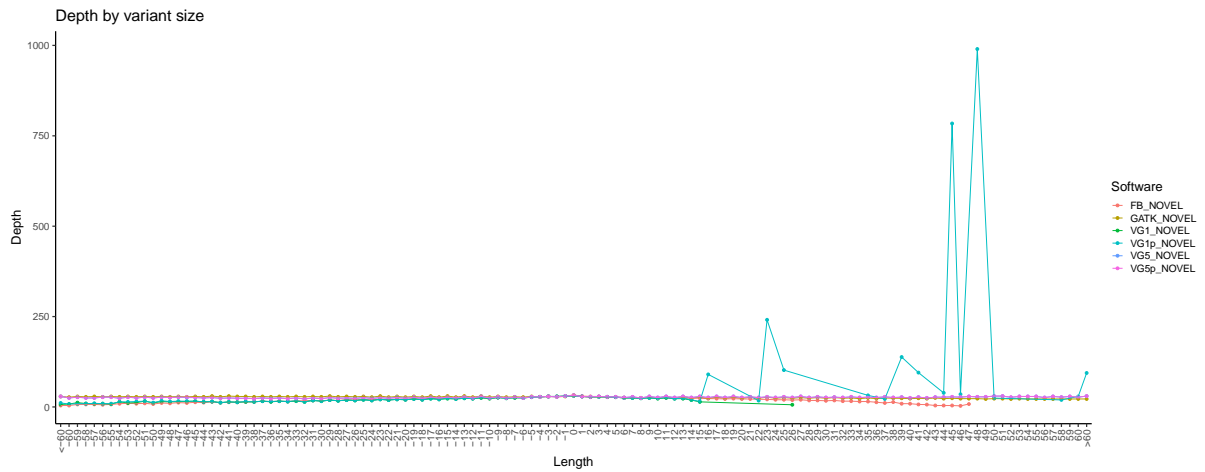

# Variant Allelic Balance (AB)

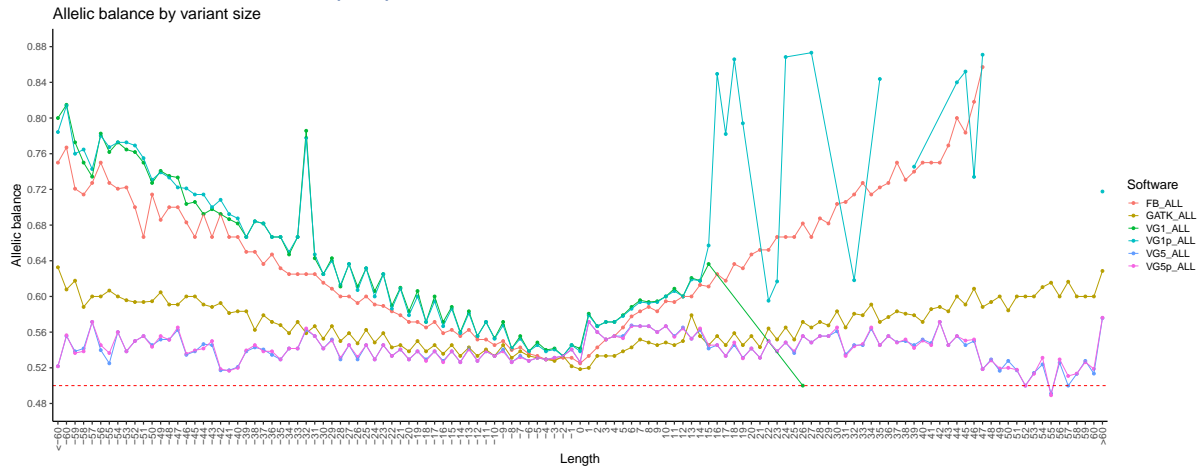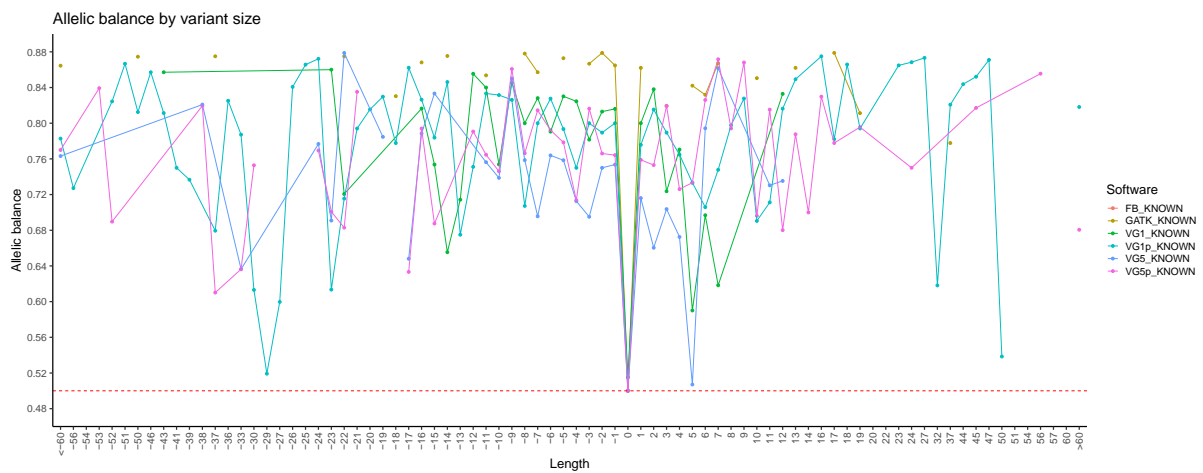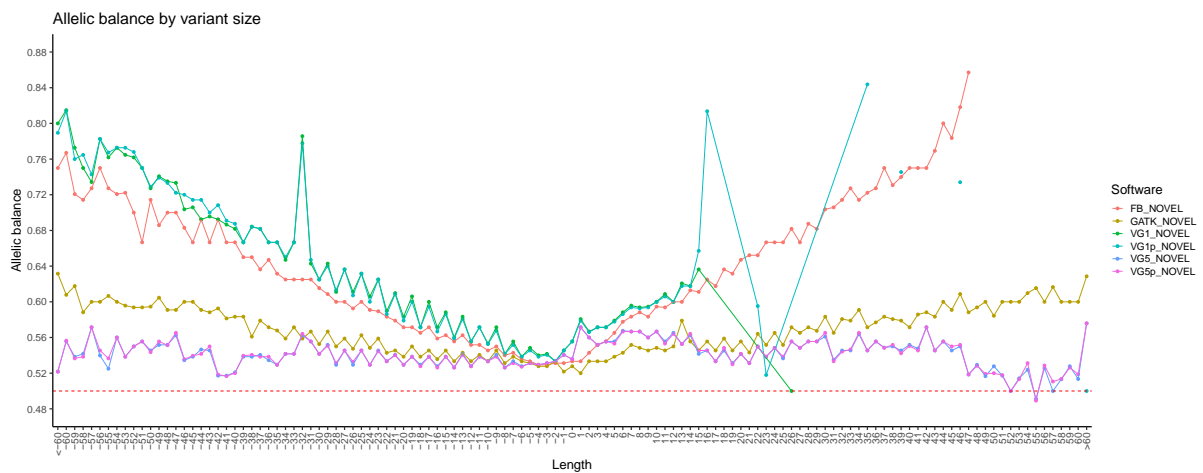



# Variant Transition/Transversion ratio (TiTv)

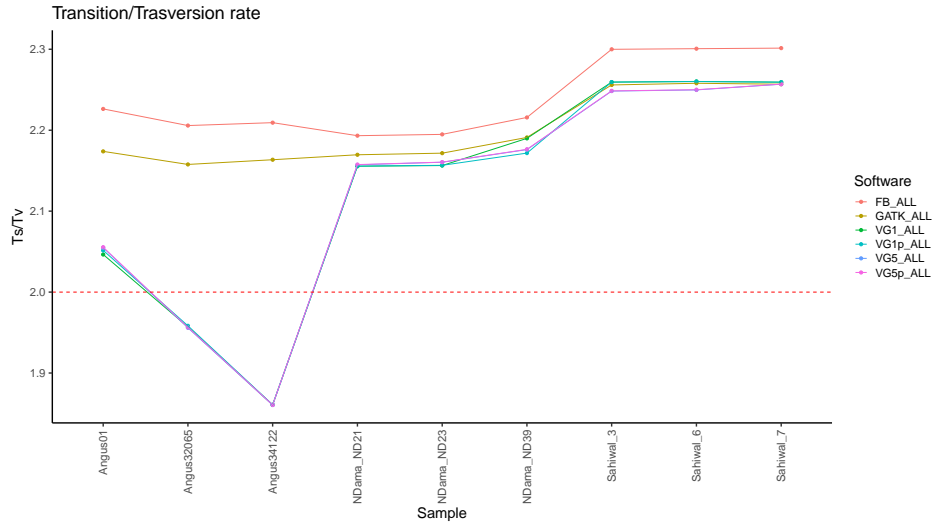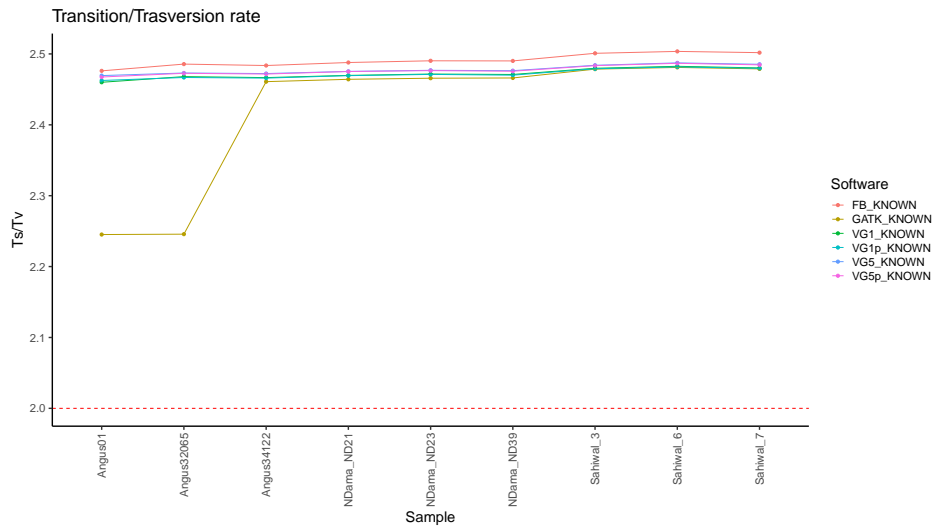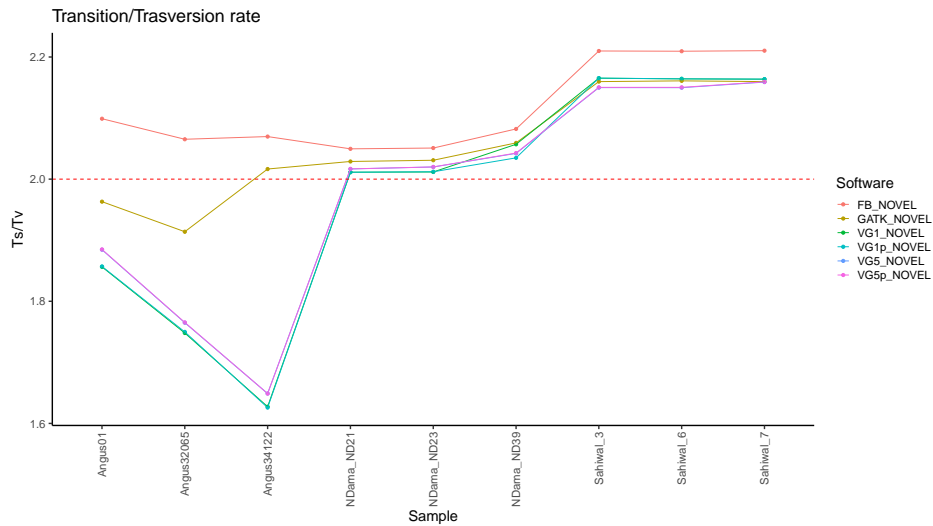

# Scenario B: Graph-specific variants as known

## Variant Number by size

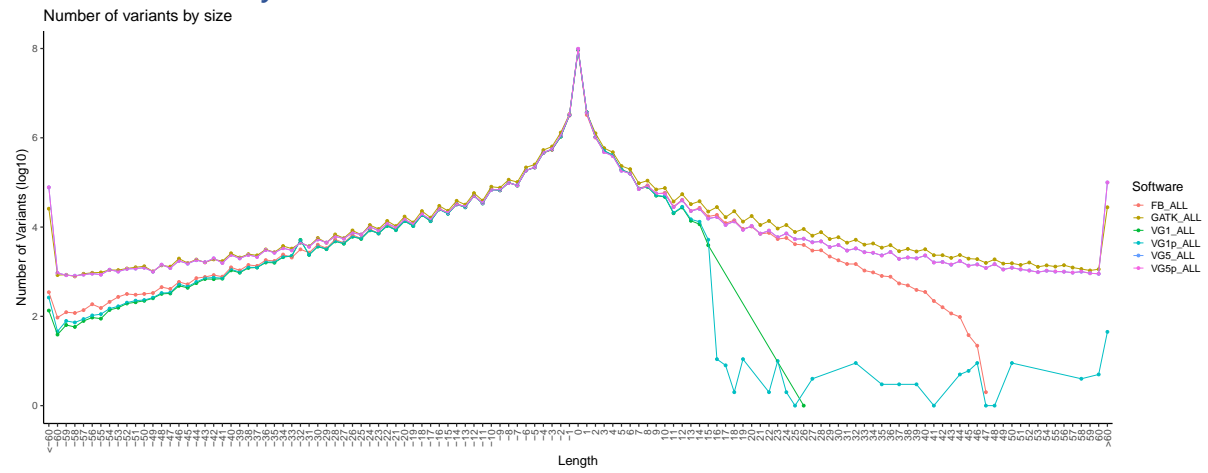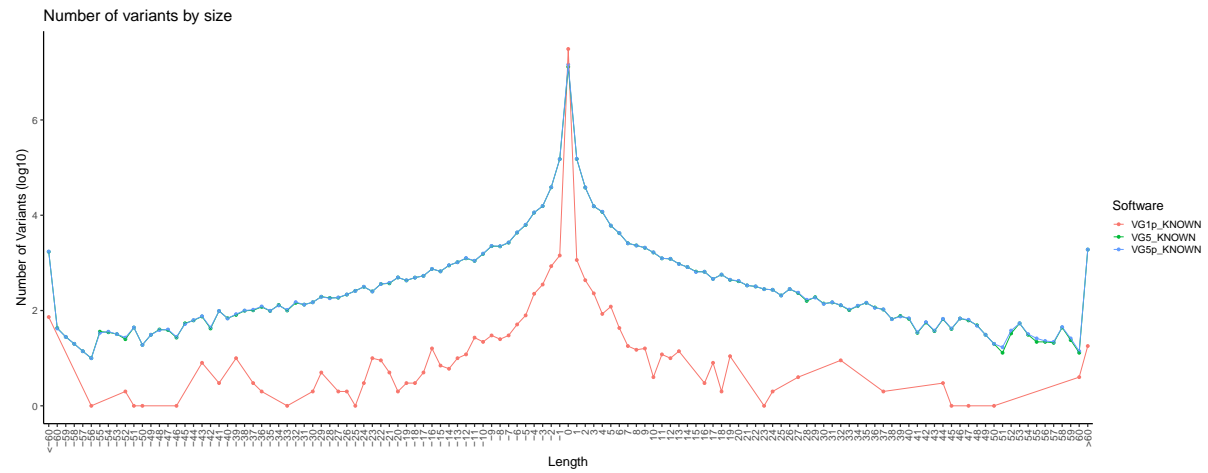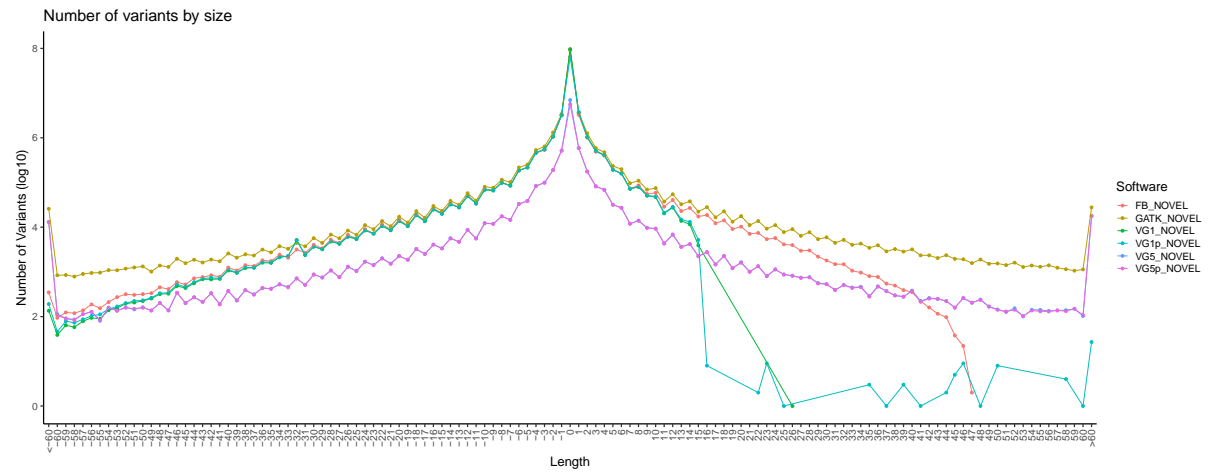

# Variant QUAL by Size

Standardized QUAL value by variant size

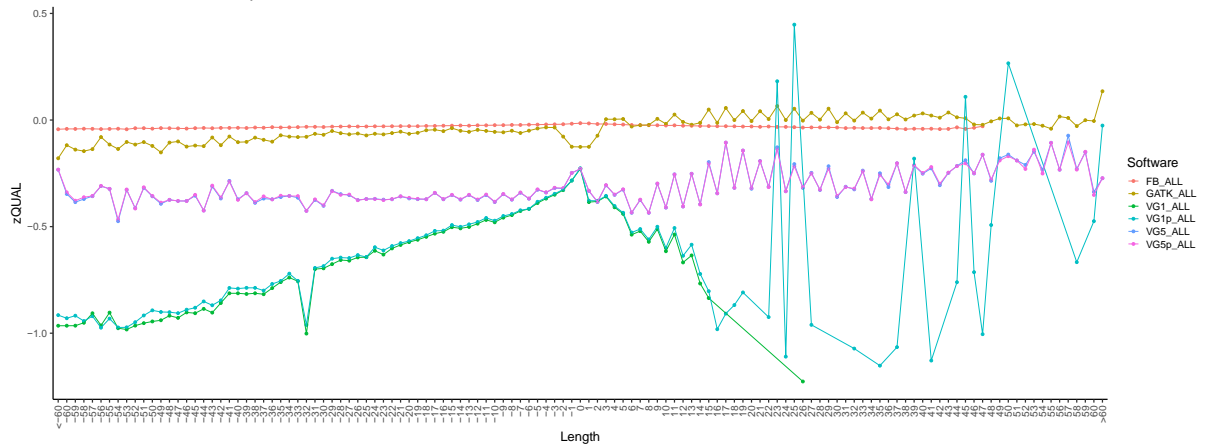

Depth by variant size

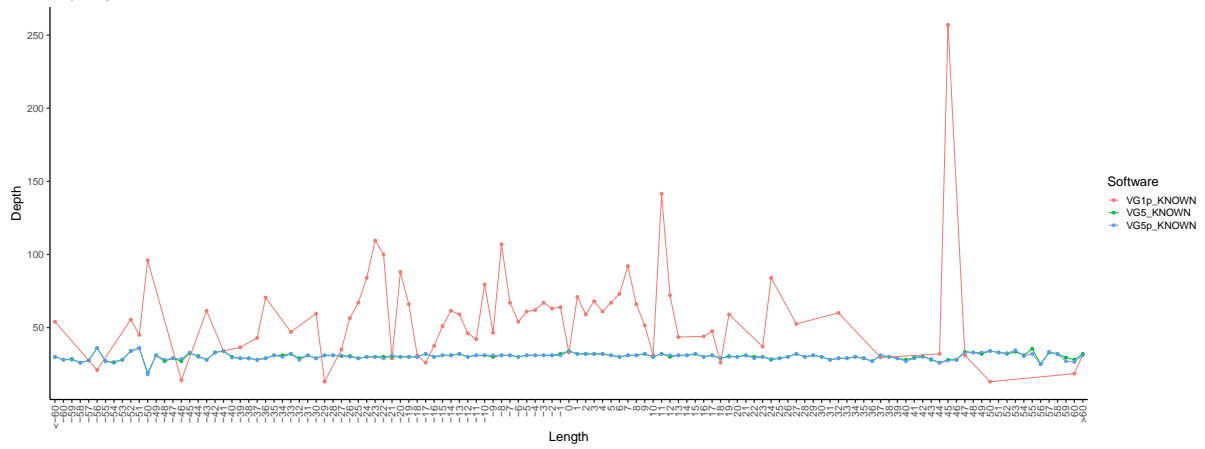

Depth by variant size

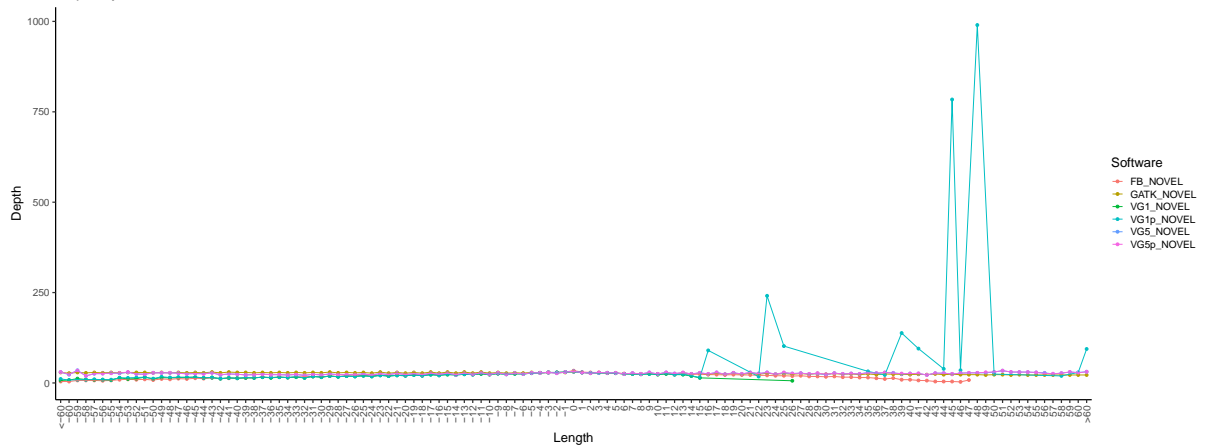

# Variant Depth by Size

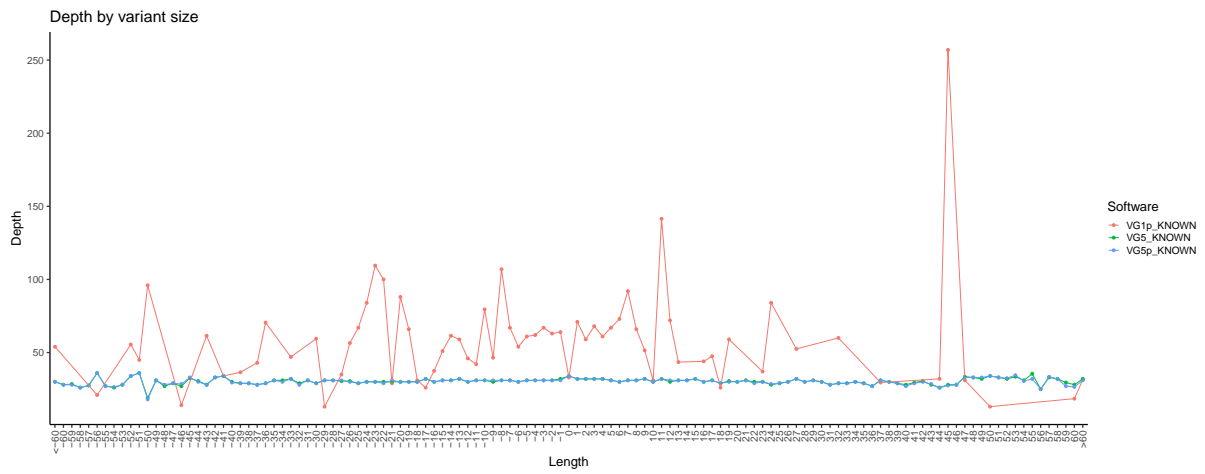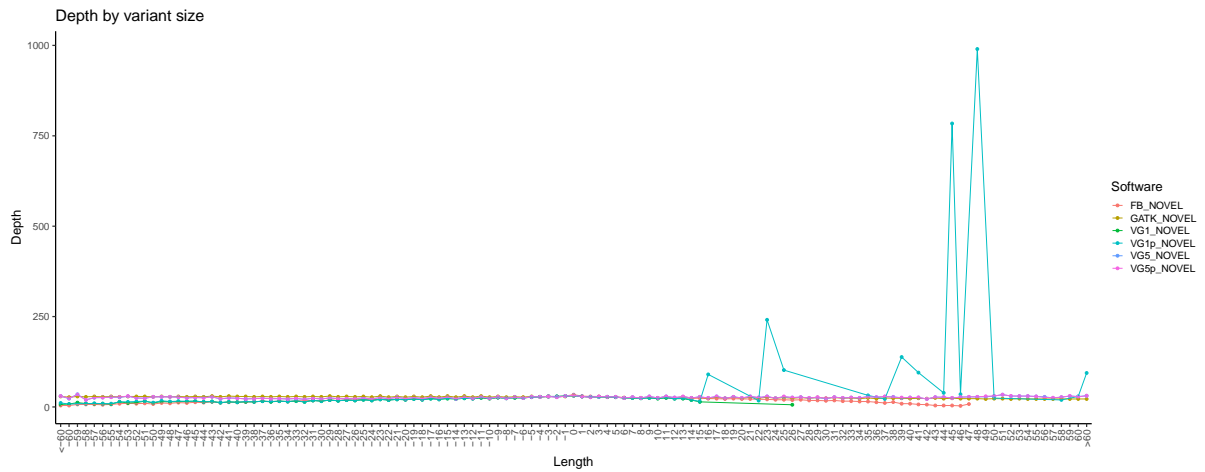

# Variant Allelic Balance (AB) by Size

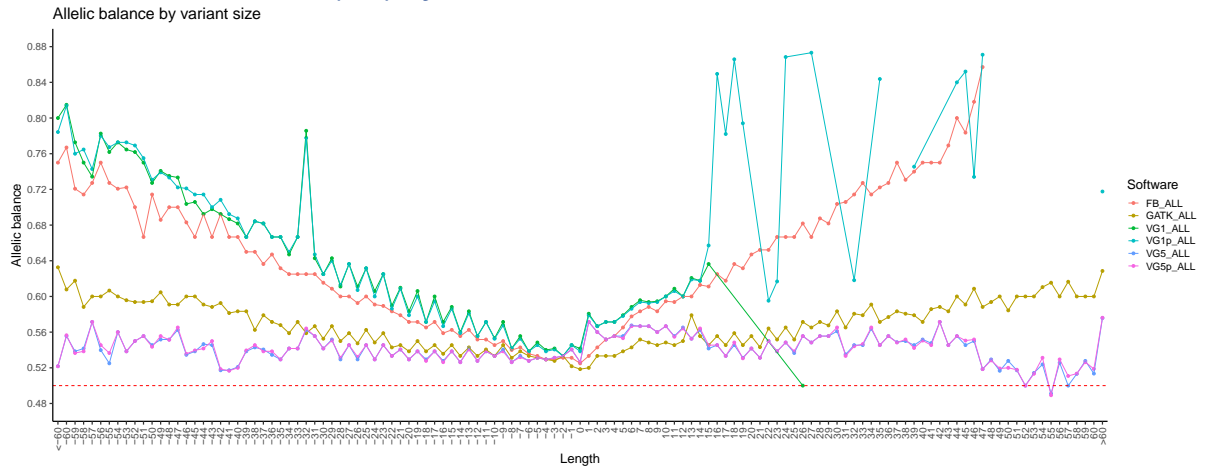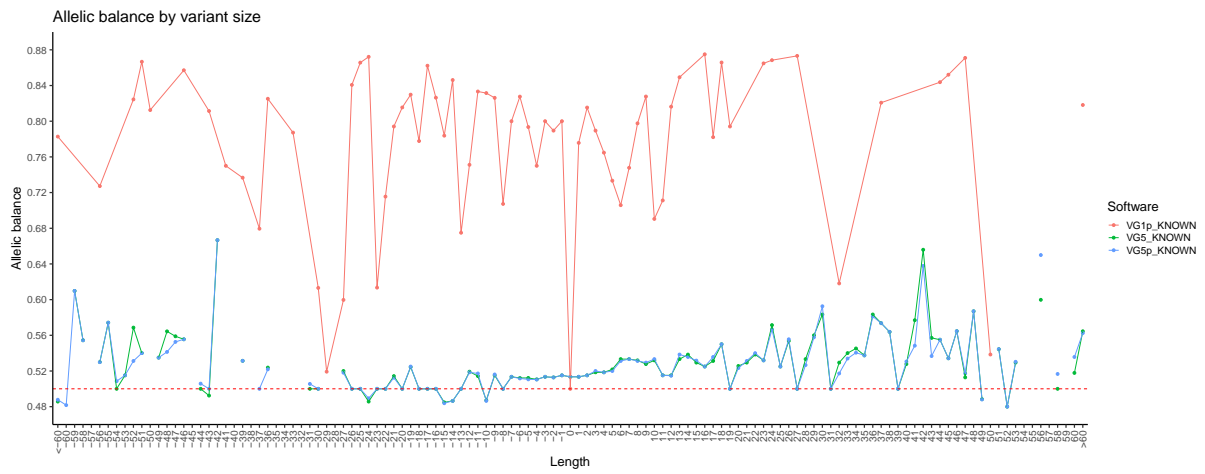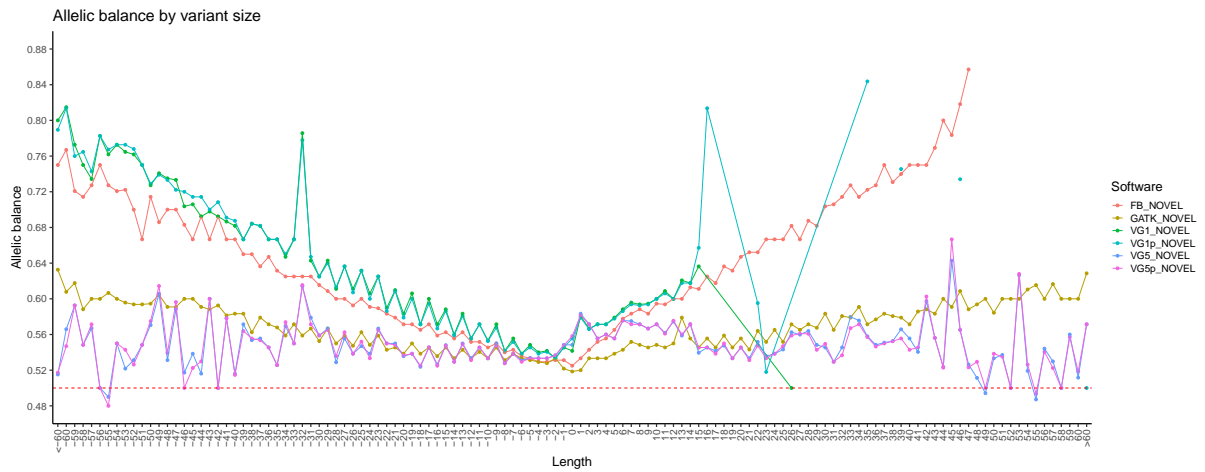

# Variant Transition/Transversion ratio (TiTv)

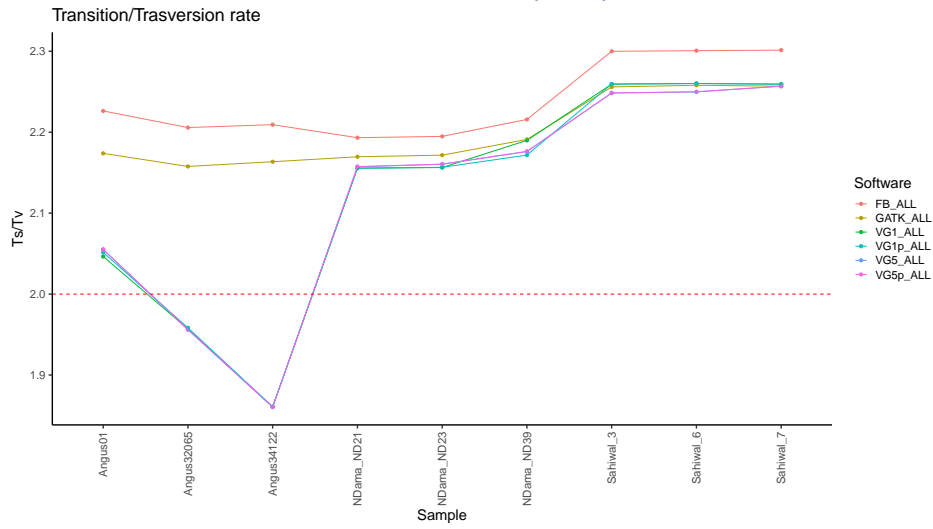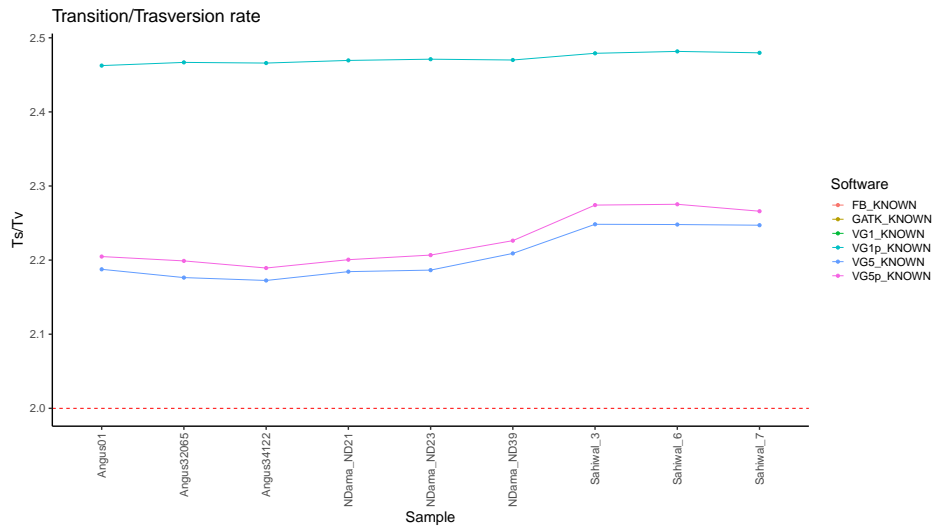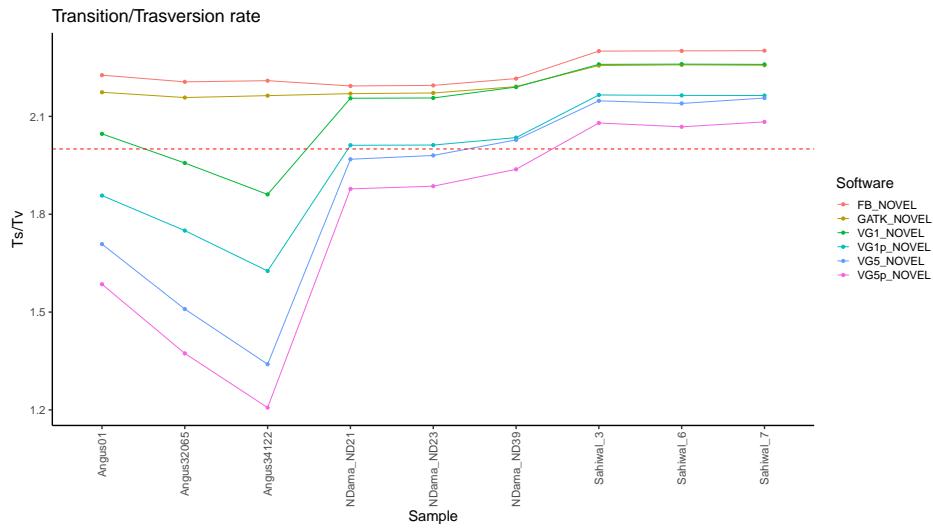

## Supplementary Tables

Supplementary Table 1: Nodes (i.e. fragments of sequence), edges (connections between nodes) and lengths for the four graph genomes generated using VG.

| Chromosome | Nodes      |             |             |             | Edges      |             |             |             | Length        |               |               |               |
|------------|------------|-------------|-------------|-------------|------------|-------------|-------------|-------------|---------------|---------------|---------------|---------------|
|            | VG1        | VG1p        | VG5         | VG5P        | VG1        | VG1p        | VG5         | VG5P        | VG1           | VG1p          | VG5           | VG5P          |
| 1          | 4,954,191  | 6,584,429   | 9,251,514   | 10,096,305  | 4,954,190  | 7,261,296   | 10,843,437  | 11,987,980  | 158,534,110   | 159,193,840   | 163,993,460   | 164,296,320   |
| 2          | 4,257,222  | 5,703,869   | 7,789,362   | 8,555,899   | 4,257,221  | 6,304,205   | 9,101,550   | 10,139,634  | 136,231,102   | 136,815,897   | 140,416,456   | 140,690,580   |
| 3          | 3,781,412  | 5,151,300   | 6,867,567   | 7,656,465   | 3,781,411  | 5,720,530   | 8,011,124   | 9,078,791   | 121,005,158   | 121,559,594   | 125,147,658   | 125,429,553   |
| 4          | 3,750,019  | 5,111,687   | 6,953,975   | 7,714,659   | 3,750,018  | 5,677,859   | 8,150,173   | 9,181,067   | 120,000,601   | 120,552,785   | 123,711,581   | 123,985,996   |
| 5          | 3,752,792  | 4,999,817   | 7,129,985   | 7,837,366   | 3,752,791  | 5,518,011   | 8,330,515   | 9,288,043   | 120,089,316   | 120,593,886   | 129,150,326   | 129,403,184   |
| 6          | 3,681,449  | 4,875,026   | 6,937,331   | 7,561,643   | 3,681,448  | 5,370,944   | 8,140,751   | 8,986,587   | 117,806,340   | 118,288,741   | 121,820,029   | 122,043,625   |
| 7          | 3,458,836  | 4,611,447   | 6,483,931   | 7,071,049   | 3,458,835  | 5,090,341   | 7,601,548   | 8,396,963   | 110,682,743   | 111,149,259   | 115,094,870   | 115,305,592   |
| 8          | 3,541,243  | 4,813,024   | 6,474,859   | 7,195,986   | 3,541,242  | 5,341,227   | 7,558,963   | 8,535,175   | 113,319,770   | 113,833,971   | 117,751,945   | 118,009,353   |
| 9          | 3,295,453  | 4,363,489   | 6,519,015   | 7,094,968   | 3,295,452  | 4,807,291   | 7,610,124   | 8,390,406   | 105,454,467   | 105,886,239   | 117,321,810   | 117,528,044   |
| 10         | 3,228,399  | 4,492,980   | 6,274,280   | 6,975,100   | 3,228,398  | 5,018,764   | 7,332,030   | 8,281,374   | 103,308,737   | 103,820,804   | 111,960,534   | 112,212,201   |
| 11         | 3,343,203  | 4,511,925   | 6,006,286   | 6,670,888   | 3,343,202  | 4,997,621   | 6,994,503   | 7,894,020   | 106,982,474   | 107,455,061   | 110,063,050   | 110,300,342   |
| 12         | 2,725,506  | 3,579,705   | 6,325,281   | 6,799,943   | 2,725,505  | 3,934,631   | 7,582,330   | 8,226,150   | 87,216,183    | 87,562,591    | 101,279,991   | 101,451,234   |
| 13         | 2,608,511  | 3,694,577   | 4,713,442   | 5,343,381   | 2,608,510  | 4,146,392   | 5,489,335   | 6,342,511   | 83,472,345    | 83,911,288    | 86,400,371    | 86,625,722    |
| 14         | 2,575,094  | 3,490,845   | 4,746,257   | 5,255,609   | 2,575,093  | 3,871,460   | 5,515,104   | 6,204,440   | 82,403,003    | 82,773,593    | 87,891,652    | 88,073,781    |
| 15         | 2,656,494  | 3,645,440   | 5,439,455   | 5,973,670   | 2,656,493  | 4,056,762   | 6,442,808   | 7,166,965   | 85,007,780    | 85,408,361    | 91,227,610    | 91,420,305    |
| 16         | 2,531,687  | 3,443,457   | 4,709,468   | 5,221,595   | 2,531,686  | 3,822,266   | 5,502,216   | 6,195,675   | 81,013,979    | 81,382,579    | 84,645,483    | 84,828,625    |
| 17         | 2,286,477  | 3,055,545   | 4,274,504   | 4,705,739   | 2,286,476  | 3,375,203   | 5,007,621   | 5,591,619   | 73,167,244    | 73,478,087    | 76,304,198    | 76,458,463    |
| 18         | 2,056,895  | 2,770,605   | 3,890,050   | 4,322,813   | 2,056,894  | 3,067,595   | 4,553,450   | 5,139,526   | 65,820,629    | 66,109,525    | 69,204,425    | 69,359,413    |
| 19         | 1,982,805  | 2,659,019   | 3,750,778   | 4,115,143   | 1,982,804  | 2,939,942   | 4,403,051   | 4,896,405   | 63,449,741    | 63,723,150    | 66,113,060    | 66,243,432    |
| 20         | 2,249,207  | 3,047,288   | 3,937,801   | 4,428,948   | 2,249,206  | 3,379,179   | 4,556,671   | 5,221,477   | 71,974,595    | 72,297,013    | 74,993,590    | 75,168,771    |
| 21         | 2,183,218  | 2,951,323   | 4,268,389   | 4,687,235   | 2,183,217  | 3,271,024   | 5,026,387   | 5,594,312   | 69,862,954    | 70,173,574    | 74,009,075    | 74,159,834    |
| 22         | 1,899,158  | 2,699,988   | 3,436,590   | 3,914,393   | 1,899,157  | 3,033,041   | 3,995,583   | 4,642,422   | 60,773,035    | 61,096,239    | 63,369,249    | 63,539,916    |
| 23         | 1,640,582  | 2,365,162   | 3,574,698   | 3,986,677   | 1,640,581  | 2,667,044   | 4,272,809   | 4,831,633   | 52,498,615    | 52,791,725    | 57,079,504    | 57,228,272    |
| 24         | 1,947,415  | 2,696,224   | 3,696,008   | 4,090,885   | 1,947,414  | 3,007,528   | 4,348,584   | 4,883,751   | 62,317,253    | 62,619,389    | 64,016,876    | 64,158,252    |
| 25         | 1,323,452  | 1,786,548   | 2,383,272   | 2,646,103   | 1,323,451  | 1,979,151   | 2,776,810   | 3,133,038   | 42,350,435    | 42,537,360    | 43,569,786    | 43,663,965    |
| 26         | 1,624,760  | 2,251,109   | 2,958,553   | 3,331,871   | 1,624,759  | 2,511,443   | 3,456,680   | 3,961,983   | 51,992,305    | 52,245,403    | 53,708,772    | 53,842,318    |
| 27         | 1,425,379  | 1,991,336   | 2,883,714   | 3,187,086   | 1,425,378  | 2,227,426   | 3,419,790   | 3,831,449   | 45,612,108    | 45,840,707    | 48,137,849    | 48,247,190    |
| 28         | 1,435,630  | 2,038,693   | 2,856,754   | 3,209,997   | 1,435,629  | 2,289,739   | 3,324,155   | 3,802,741   | 45,940,150    | 46,183,254    | 52,653,916    | 52,780,354    |
| 29         | 1,596,832  | 2,192,891   | 3,209,231   | 3,526,945   | 1,596,831  | 2,441,034   | 3,795,304   | 4,225,973   | 51,098,607    | 51,339,594    | 54,311,770    | 54,426,115    |
| Total      | 77,793,321 | 105,578,748 | 147,742,350 | 163,178,361 | 77,793,292 | 117,128,949 | 173,143,406 | 194,052,110 | 2,489,385,779 | 2,500,623,509 | 2,625,348,896 | 2,630,880,752 |

Supplementary Table 2: Number of structural variants detected using the VG5p graph on all samples and those specific to the different breeds, with the number of overlaps with variants from optical mapping in comparison of 10,000 random regions of equal size and respective two-tailed P values calculated from the Z-scores.

|                                 | GLOBAL SV (VG5p) | ANGUS SV (VG5p) | NDAMA SV (VG5p) | SAHIWAL SV (VG5p) |
|---------------------------------|------------------|-----------------|-----------------|-------------------|
| Overlap with optical mapping SV | 6598             | 10              | 42              | 111               |
| Total SVs considered            | 12306            | 19              | 49              | 299               |
| Random SV tests                 | 10000            | 10000           | 10000           | 10000             |
| Mean                            | 1571.1736        | 2.5814          | 6.2295          | 38.5017           |
| StD                             | 36.92566335      | 1.32088929      | 2.34400921      | 5.790177          |
| Z-score                         | 136.133679       | 5.61636775      | 15.2603922      | 12.5209126        |
| P-value                         | 0                | 1.9501E-08      | 1.404E-52       | 5.7372E-36        |



Supplementary Table 3: Number of structural variants from the VG5p graph longer than 500 bp and those overlapping an optical mapping SV.

| Breed   | SV>500bp | SV>500bp in<br>OM | Ratio | Average<br>size |
|---------|----------|-------------------|-------|-----------------|
| Angus   | 7318     | 2797              | 38.22 | 2050.66         |
| NDama   | 7280     | 2932              | 40.27 | 2055.42         |
| Sahiwal | 10046    | 3368              | 33.53 | 1880.9          |

Supplementary table 4: Number of structural variants discovered using DellyV2 at the different filtering stages.

| Breed   | Sample     | N SV   | Filtered SVs genotyped (individual) | 500bp SV by breed | 500bp SV dataset | 500bp SV dataset overlapping optical maps | 500bp SV dataset overlapping optical maps (%ge) |
|---------|------------|--------|-------------------------------------|-------------------|------------------|-------------------------------------------|-------------------------------------------------|
|         | Angus01    | 7,533  | 2,167                               |                   |                  |                                           |                                                 |
| Angus   | Angus32065 | 7,244  | 2,008                               | 3,175             |                  |                                           |                                                 |
|         | Angus34122 | 6,878  | 1,940                               |                   |                  |                                           |                                                 |
|         | ND21       | 15,061 | 2,945                               |                   |                  |                                           |                                                 |
| N'Dama  | ND23       | 15,474 | 3,010                               | 5,206             | 11,562           | 5,371                                     | 46.45%                                          |
|         | ND39       | 17,399 | 3,418                               |                   |                  |                                           |                                                 |
|         | Sahiwal_3  | 30,941 | 5,395                               |                   |                  |                                           |                                                 |
| Sahiwal | Sahiwal_6  | 31,162 | 5,396                               | 8,421             |                  |                                           |                                                 |
|         | Sahiwal_7  | 30,466 | 5,356                               |                   |                  |                                           |                                                 |

Supplementary Table 5: Number of ATAC-seq reads mapped to the different linear, breed-specific genomes and to the expanded linear Hereford genome (ARS-UCD1.2+), with the relative improvement in the latter in comparison with the standard Hereford genome.

| Breed    | Sample                   | TOTAL         | ANGUS         | ANKOLE        | BRAHMAN       | HEREFORD      | NDAMA         | ARS-UCD1.2+   | Improvement |
|----------|--------------------------|---------------|---------------|---------------|---------------|---------------|---------------|---------------|-------------|
| Holstein | HF3457 (B-cell)          | 443,051,164   | 567,930,948   | 465,623,093   | 457,627,237   | 451,083,749   | 484,590,179   | 469,621,291   | 1.04109556  |
|          | ND230 (B-cell)           | 625,474,292   | 773,090,861   | 654,307,023   | 642,870,385   | 632,982,181   | 678,181,434   | 658,824,369   | 1.04082609  |
| N'Dama   | Nelore2 (B-cell)         | 1,773,894,312 | 2,425,549,286 | 1,934,181,179 | 1,861,955,997 | 1,848,420,148 | 2,022,532,403 | 1,922,158,212 | 1.03989248  |
|          | HF3457 (nucleosome-free) | 1,169,362,448 | 1,186,338,288 | 1,178,742,664 | 1,170,695,333 | 1,156,154,503 | 1,189,296,521 | 1,180,022,346 | NA          |

Supplementary Table 6: Peaks called using the different linear, breed-specific assemblies and the expanded linear Hereford genome (ARS-UCD1.2+), with the number of peaks after excluding the signals in common with the nuclease-free peaks and the number overlapping a predicted gene from Augustus.

| Reference          | Breed    | Sample             | Raw    | No blank | No blank significant | Low repetitive content | Low repetitive content significant | Cross-referenced | Ratio | Ratio significant |
|--------------------|----------|--------------------|--------|----------|----------------------|------------------------|------------------------------------|------------------|-------|-------------------|
| ANGUS              | Holstein | HF3457_Bcell_ATAC  | 37811  | 33096    | 26                   | 24468                  | 22                                 | 0                | 0.845 | 0.813             |
| ANGUS              | N'Dama   | ND230_Bcell_ATAC   | 37768  | 34397    | 39                   | 22827                  | 34                                 | 0                | 0.734 | 0.796             |
| ANGUS              | Nelore   | Nelore2_Bcell_ATAC | 55209  | 50266    | 722                  | 33454                  | 701                                | 0                | 0.886 | 0.899             |
| ANKOLE             | Holstein | HF3457_Bcell_ATAC  | 47367  | 38177    | 74                   | 24242                  | 14                                 | 0                | 0.975 | 2.313             |
| ANKOLE             | N'Dama   | ND230_Bcell_ATAC   | 46388  | 40166    | 124                  | 22603                  | 14                                 | 0                | 0.857 | 2.531             |
| ANKOLE             | Nelore   | Nelore2_Bcell_ATAC | 65189  | 55723    | 782                  | 34384                  | 680                                | 0                | 0.982 | 0.974             |
| ARS-UCD1.2+        | Holstein | HF3457_Bcell_ATAC  | 45041  | 40621    | 19                   | 29581                  | 15                                 | 38396            | 1.037 | 0.594             |
| ARS-UCD1.2+        | N'Dama   | ND230_Bcell_ATAC   | 50728  | 47608    | 30                   | 25637                  | 24                                 | 44390            | 1.016 | 0.612             |
| ARS-UCD1.2+        | Nelore   | Nelore2_Bcell_ATAC | 60841  | 57451    | 832                  | 35226                  | 801                                | 55408            | 1.013 | 1.036             |
| BRAHMAN            | Holstein | HF3457_Bcell_ATAC  | 36426  | 33216    | 20                   | 26484                  | 14                                 | 0                | 0.848 | 0.625             |
| BRAHMAN            | N'Dama   | ND230_Bcell_ATAC   | 40204  | 37672    | 28                   | 25871                  | 18                                 | 0                | 0.804 | 0.571             |
| BRAHMAN            | Nelore   | Nelore2_Bcell_ATAC | 51011  | 48965    | 742                  | 34228                  | 709                                | 0                | 0.863 | 0.924             |
| HEREFORD           | Holstein | HF3457_Bcell_ATAC  | 43464  | 39160    | 32                   | 28524                  | 28                                 | 0                | 1.000 | 1.000             |
| HEREFORD           | N'Dama   | ND230_Bcell_ATAC   | 49826  | 46857    | 49                   | 25271                  | 43                                 | 0                | 1.000 | 1.000             |
| HEREFORD           | Nelore   | Nelore2_Bcell_ATAC | 59961  | 56717    | 803                  | 34970                  | 772                                | 0                | 1.000 | 1.000             |
| NDAMA              | Holstein | HF3457_Bcell_ATAC  | 45679  | 41078    | 47                   | 29602                  | 32                                 | 0                | 1.049 | 1.469             |
| NDAMA              | N'Dama   | ND230_Bcell_ATAC   | 51818  | 48779    | 77                   | 25907                  | 57                                 | 0                | 1.041 | 1.571             |
| NDAMA              | Nelore   | Nelore2_Bcell_ATAC | 57639  | 54814    | 869                  | 35242                  | 834                                | 0                | 0.966 | 1.082             |
| HEREFORD_unique    | Holstein | HF3457_Bcell_ATAC  | 146177 | 145020   | 36                   | 117089                 | 36                                 | 0                | 1.000 | 1.000             |
| HEREFORD_unique    | N'Dama   | ND230_Bcell_ATAC   | 205374 | 204361   | 322                  | 154885                 | 321                                | 0                | 1.000 | 1.000             |
| HEREFORD_unique    | Nelore   | Nelore2_Bcell_ATAC | 73084  | 72463    | 2849                 | 55329                  | 2703                               | 0                | 1.000 | 1.000             |
| ARS-UCD1.2+_unique | Holstein | HF3457_Bcell_ATAC  | 149386 | 148426   | 39                   | 119525                 | 39                                 | 0                | 1.023 | 1.083             |
| ARS-UCD1.2+_unique | N'Dama   | ND230_Bcell_ATAC   | 210319 | 209480   | 320                  | 158348                 | 319                                | 0                | 1.025 | 0.994             |
| ARS-UCD1.2+_unique | Nelore   | Nelore2_Bcell_ATAC | 73751  | 73272    | 2873                 | 55907                  | 2725                               | 0                | 1.011 | 1.008             |

Supplementary Table 7: List of samples used in the study, with their associated accessions.

| Type | Sample ID           | Sample ENA   | Library      | Base yield      | Coverage (x) | Platform              |
|------|---------------------|--------------|--------------|-----------------|--------------|-----------------------|
| WGS  | Angus01             | SAMN03387020 | SRR2016763   | 30,243,902,200  | 34.38        | Illumina HiSeq 2000   |
|      |                     |              | SRR2016765   | 23,263,065,800  |              | Illumina HiSeq 2000   |
|      |                     |              | SRR2016766   | 15,033,757,200  |              | Illumina HiSeq 2000   |
|      |                     |              | SRR2016767   | 24,278,048,000  |              | Illumina HiSeq 2000   |
| WGS  | Angus32065          | SAMN05788510 | SRR4280084   | 50,893,456,010  | 33.42        | Illumina HiSeq 2000   |
|      |                     |              | SRR4280085   | 39,338,730,967  |              | Illumina HiSeq 2000   |
| WGS  | Angus34122          | SAMN05788530 | SRR4280168   | 47,012,045,232  | 31.85        | Illumina HiSeq 2500   |
|      |                     |              | SRR4280169   | 38,995,161,038  |              | Illumina HiSeq 2500   |
| WGS  | NDama_ND21          | ERS4826976   | ERS4826976   | 139,358,632,563 | 51.61        | HiSeq X Ten           |
| WGS  | NDama_ND23          | ERS4826977   | ERR4352199   | 142,322,660,295 | 52.71        | HiSeq X Ten           |
| WGS  | NDama_ND39          | ERS4826978   | ERR4352264   | 142,976,110,300 | 52.95        | HiSeq X Ten           |
| WGS  | Sahiwal_3           | ERS4818261   | ERR4350687   | 125,539,224,218 | 46.50        | HiSeq X Ten           |
| WGS  | Sahiwal_6           | ERS4818262   | ERR4336349   | 120,710,854,101 | 44.71        | HiSeq X Ten           |
| WGS  | Sahiwal_7           | ERS4818263   | ERR4336437   | 128,921,757,833 | 47.75        | HiSeq X Ten           |
| ATAC | HF3457_Bcell_ATAC   | ERS8971208   | ERR7448822   |                 |              | Illumina HiSeq 4000   |
| ATAC |                     |              | ERR7448819   |                 |              | Illumina HiSeq 4000   |
| ATAC |                     |              | ERR7448818   |                 |              | Illumina HiSeq 4000   |
| ATAC |                     |              | ERR7448820   |                 |              | Illumina HiSeq 4000   |
| ATAC | ND230_Bcell_ATAC    | ERS8971209   | ERR7451279   |                 |              | Illumina NovaSeq 6000 |
| ATAC | Nelore2_Bcell_ATAC  | ERS8971210   | ERR7451506   |                 |              | Illumina NovaSeq 6000 |
| ATAC |                     |              | ERR7451524   |                 |              | Illumina NovaSeq 6000 |
| ATAC | HF3457_nucfree_ATAC | ERS8971208   | ERR7448832   |                 |              | Illumina HiSeq 4000   |
| ATAC |                     |              | ERR7448837   |                 |              | Illumina HiSeq 4000   |
| ATAC |                     |              | ERR7448839   |                 |              | Illumina HiSeq 4000   |
| ATAC |                     |              | ERR7448835   |                 |              | Illumina HiSeq 4000   |
| WGS  | Angus_SAMN05788481  |              | E:SRR4279946 |                 |              | Illumina HiSeq 2500   |
| WGS  | Angus_SAMN05788481  |              | E:SRR4279947 |                 |              | Illumina HiSeq 2500   |
| WGS  | Angus_SAMN05788481  |              | E:SRR4279948 |                 |              | Illumina HiSeq 2500   |
| WGS  | Angus_SAMN05788481  |              | E:SRR4279949 |                 |              | Illumina HiSeq 2500   |
| WGS  | Angus_SAMN05788480  |              | E:SRR4279940 |                 |              | Illumina HiSeq 2500   |
| WGS  | Angus_SAMN05788480  |              | E:SRR4279941 |                 |              | Illumina HiSeq 2500   |
| WGS  | Angus_SAMN05788480  |              | E:SRR4279942 |                 |              | Illumina HiSeq 2500   |
| WGS  | Angus_SAMN05788480  |              | E:SRR4279943 |                 |              | Illumina HiSeq 2500   |
| WGS  | Angus_SAMN05788480  |              | E:SRR4279944 |                 |              | Illumina HiSeq 2500   |
| WGS  | Angus_SAMN05788480  |              | E:SRR4279945 |                 |              | Illumina HiSeq 2500   |
| WGS  | Angus_SAMN05788482  |              | E:SRR4279950 |                 |              | Illumina HiSeq 2500   |
| WGS  | Angus_SAMN05788482  |              | E:SRR4279951 |                 |              | Illumina HiSeq 2500   |
| WGS  | Angus_SAMN05788482  |              | E:SRR4279952 |                 |              | Illumina HiSeq 2500   |
| WGS  | Angus_SAMN05788482  |              | E:SRR4279953 |                 |              | Illumina HiSeq 2500   |
| OM   | Ndama_1_1628_A      | ERS8452869   | ERZ4193982   |                 |              | Bionano Saphyr        |
| OM   | Ndama_NN031_B       | ERS8452868   | ERZ4193983   |                 |              | Bionano Saphyr        |

## Supplementary references

1. Buenrostro, J. D. *et al.* Single-cell chromatin accessibility reveals principles of regulatory variation. *Nature* (2015) doi:10.1038/nature14590.
2. Li, H. Minimap2: Pairwise alignment for nucleotide sequences. *Bioinformatics* **34**, 3094–3100 (2018).
3. Li, H. *et al.* The Sequence Alignment/Map format and SAMtools. *Bioinformatics* **25**, 2078–2079 (2009).
4. Koren, S. *et al.* Canu: Scalable and accurate long-read assembly via adaptive  $\kappa$ -mer weighting and repeat separation. *Genome Res.* **27**, 722–736 (2017).
5. Chin, C. S. *et al.* Phased diploid genome assembly with single-molecule real-time sequencing. *Nat. Methods* **13**, 1050–1054 (2016).
6. Walker, B. J. *et al.* Pilon: An integrated tool for comprehensive microbial variant detection and genome assembly improvement. *PLoS ONE* **9**, e112963–e112963 (2014).
7. Waterhouse, R. M. *et al.* BUSCO Applications from Quality Assessments to Gene Prediction and Phylogenomics. *Mol. Biol. Evol.* **35**, 543–548 (2018).
8. Minkin, I. & Medvedev, P. Scalable multiple whole-genome alignment and locally collinear block construction with SibeliaZ. *bioRxiv* 548123–548123 (2019) doi:10.1101/548123.
9. Kolmogorov, M. *et al.* Chromosome assembly of large and complex genomes using multiple references. *Genome Res.* **28**, 1720–1732 (2018).
10. Mikheenko, A., Prjibelski, A., Saveliev, V., Antipov, D. & Gurevich, A. Versatile genome assembly evaluation with QAST-LG. in vol. 34 i142–i150 (Oxford University Press, 2018).
11. Xu, G.-C. *et al.* LR\_Gapcloser: a tiling path-based gap closer that uses long reads to complete genome assembly. *GigaScience* **8**, (2018).

12. Barnett, D. W., Garrison, E. K., Quinlan, A. R., Střimberg, M. P. & Marth, G. T. Bamtools: A C++ API and toolkit for analyzing and managing BAM files. *Bioinformatics* **27**, 1691–1692 (2011).
13. Rhie, A., Walenz, B. P., Koren, S. & Phillippy, A. M. Merqury: Reference-free quality, completeness, and phasing assessment for genome assemblies. *Genome Biol.* **21**, (2020).
14. Kent, W. J. BLAT---The BLAST-Like Alignment Tool. *Genome Res.* **12**, 656–664 (2002).
15. Smit, A., Hubley, R. & Green, P. RepeatMasker Open-4.0. (2015).
16. Quinlan, A. R. & Hall, I. M. BEDTools: a flexible suite of utilities for comparing genomic features. *Bioinforma. Oxf. Engl.* **26**, 841–2 (2010).
17. Ruan, J. & Li, H. Fast and accurate long-read assembly with wtdbg2. *Nat. Methods* **17**, 155–158 (2020).
18. Chakraborty, M., Baldwin-Brown, J. G., Long, A. D. & Emerson, J. J. Contiguous and accurate de novo assembly of metazoan genomes with modest long read coverage. *Nucleic Acids Res.* **44**, gkw654–gkw654 (2016).
19. Marçais, G. *et al.* MUMmer4: A fast and versatile genome alignment system. *PLoS Comput. Biol.* **14**, e1005944–e1005944 (2018).
20. Chakraborty, M., Baldwin-Brown, J. G., Long, A. D. & Emerson, J. J. Contiguous and accurate de novo assembly of metazoan genomes with modest long read coverage. *Nucleic Acids Res.* **44**, gkw654 (2016).
